# Supplementary material for: Zooplankton faecal pellet transfer through the meso- and bathypelagic layers in the Southern Ocean in spring
Source: Copernicus journal article supplement (doi:10.5194/bg-2016-520), 2016-12-02
Supplement: Supplementary file [file bg-2016-520-AC3-supplement.pdf]

National Oceanography Centre  
European Way  
Southampton SO14 3ZH  
United Kingdom  
22/02/2017

Copernicus Gesellschaft mbH  
Bahnhofsallee 1e  
37081 Göttingen  
Germany

**Re: BG – 2016-520 Belcher et al.**

Dear Dr Gerhard Herndl,

Please find enclosed our revised manuscript (marked up version), complete with tables, figures and supplementary material. We submit this in response to the comments from two anonymous reviewers and have addressed their concerns. Please see also our point-by-point response to each reviewer which has been uploaded on the Biogeosciences Discussion page.

In particular, we have revised the manuscript title and text to make sure it reflects our focus on copepods rather than the whole zooplankton community. Additionally, we have examined current meter data to back up our statement that lateral advection did not play an important role at the depth of the sediment traps. We also now provide the absolute counts of faecal pellets in both sediment trap and marine snow catcher samples, as well as faecal pellet sinking velocities. We hope this provides transparency to our work and also provides useful data for future studies.

We think that the manuscript has been improved and thank the two anonymous reviewers for their helpful suggestions. Thank you for taking the time to review this submission, we look forward to hearing from you.

Yours Sincerely,



Anna Belcher

# ~~Zooplankton~~-Copepod faecal pellet transfer through the meso- and bathypelagic layers in the Southern Ocean in spring

Anna Belcher<sup>1,2</sup>, Clara Manno<sup>3</sup>, Peter Ward<sup>3</sup>, Stephanie Henson<sup>1</sup>, Richard Sanders<sup>1</sup>, Geraint A. Tarling<sup>3</sup>

<sup>1</sup>National Oceanography Centre, Southampton, SO14 3ZH, UK

<sup>2</sup>University of Southampton, Southampton, SO14 3ZH, UK

<sup>3</sup> British Antarctic Survey, Cambridge, CB3 0ET, UK

Correspondence to: Anna Belcher ([A.Belcher@noc.soton.ac.uk](mailto:A.Belcher@noc.soton.ac.uk))

**Abstract.** The faecal pellets (FP) of zooplankton can be important vehicles for the transfer of particulate organic carbon (POC) to the deep ocean, often making large contributions to carbon sequestration. However, the routes by which these FP reach the deep ocean have yet to be fully resolved. We address this by comparing estimates of [copepod](#) FP production to measurements of [copepod](#) FP size, shape and number in the upper mesopelagic (175-205 m) using Marine Snow Catchers, and in the bathypelagic using sediment traps (1,500-2,000 m). The study is focussed on the Scotia Sea, which contains some of the most productive regions in the Southern Ocean, where epipelagic FP production is likely to be high. We found that, although the size distribution of [the zooplankton-copepod community](#) suggests that high numbers of small FP are produced in the epipelagic, small FP are rare in the deeper layers, implying that they are not transferred efficiently to depth. Consequently, small FP make only a minor contribution to FP fluxes in the meso- and bathypelagic, particularly in terms of carbon. The dominant FP in the upper mesopelagic were cylindrical and elliptical, while ovoid FP were dominant in the bathypelagic. The change in FP morphology, as well as size distribution, points to the repacking of surface FP in the mesopelagic and in situ production in the lower meso- and bathypelagic, [which may be](#) augmented by inputs of FP via zooplankton vertical migrations. The flux of carbon to the deeper layers within the Southern Ocean is therefore strongly modulated by meso- and bathypelagic zooplankton, meaning that the community structure in these zones has a major impact on the efficiency of FP transfer to depth.

## 1 Introduction

The biological carbon pump (BCP) from the atmosphere to the deep ocean is an important process by which carbon can be sequestered for millennia or longer (Volk and Hoffert, 1985). About 10% of surface ocean primary production sinks out (is exported) of the surface ocean, with the remainder being remineralised in situ. However, only a small fraction of this material (<10%) reaches the deep ocean (Sarmiento and Gruber, 2006), with most of it being respired by grazers or bacteria (Azam et al., 1983) in the upper mesopelagic (Martin et al., 1987). ~~Thus close to 10% of surface primary production is stored in the interior, a process which~~ [Nevertheless, it is estimated that the BCP](#) keeps atmospheric CO<sub>2</sub> around 200 ppm lower than

preindustrial levels (Parekh et al., 2006). Small changes in the BCP, such as a change in the depth at which sinking material is remineralised can result in large changes to the climate system; ~~a global increase of 24 m if~~ the depth at which 63% of sinking carbon is respired is increased by 24 m globally, this could decrease atmospheric CO<sub>2</sub> by 10-27 ppm (Kwon et al., 2009). For this reason, the nature of particles occurring at different depths is important to understand.

The repackaging of slow-sinking individual phytoplankton cells into fast-sinking faecal pellets (FP) can promote efficient export of POC out of the euphotic zone (Hamm et al., 2001). The contribution of FP to bathypelagic particle fluxes can be large (>90%) (Carroll et al., 1998; Manno et al., 2015; Wilson et al., 2013), providing direct evidence of the importance of zooplankton FP to the transport of carbon to the deep ocean. However, surface produced FP can also undergo intense reworking and fragmentation in the euphotic and upper mesopelagic zones (González et al., 1994b; Wexels-Riser et al., 2001; Wexels Riser et al., 2007), through processes such as coprophagy (ingestion of FP), coprorhexy (fragmentation of FP), microbial remineralisation and physical aggregation and disaggregation (Lampitt et al., 1990; Poulsen and Iversen, 2008; Turner, 2015; Wilson et al., 2008). Thus, FP can also provide a source of nutrition for other zooplankton and bacterial communities *en route* to the deep ocean (Miquel et al., 2015; Wexels-Riser et al., 2001). The complexity of these interacting factors results in a wide range of estimates (<1->100% (Turner, 2015)) of the contribution FP make to POC flux (%FPC), which is typically measured using sediment traps (Dagg et al., 2003; Fowler et al., 1991; Gleiber et al., 2012; Manno et al., 2015; Suzuki et al., 2001; Wassmann et al., 2000; Wilson et al., 2013).

Differences in FP shape, composition and density, as well as varying depths of production (through zooplankton species residing at different depths and also vertical migration (VM)) will greatly influence the magnitude of FP associated POC that reaches the deep ocean (Atkinson et al., 2012; Steinberg et al., 2000; Wallace et al., 2013; Wilson et al., 2008). Both diel and seasonal migrations of zooplankton can directly transport carbon out of the euphotic zone to the mesopelagic, bypassing the region of rapid remineralisation (Jónasdóttir et al., 2015; Kobari et al., 2008; Steinberg et al., 2000). Different zooplankton feeding strategies will also influence the effect that their vertical migrations have on POC export (Wallace et al., 2013).

The direct sinking of zooplankton FP can provide an efficient vehicle for the sequestration of carbon in the deep ocean. For example, direct sedimentation of FP from large salp blooms in the upper ocean can result in huge depositions on the sea floor at depths of ~4000 m due to their high sinking velocities (Smith, Jr. et al., 2014). Additionally, the swarming behaviour of krill can result in *en masse* sinking of FP, which can overload recycling zooplankton grazers and be efficiently transferred through the upper ocean (Clarke et al., 1988). Alternatively, FP may arrive in the deep ocean via a FP ‘cascade’ effect (Bodungen et al., 1987; Urrere and Knauer, 1981), being constantly reworked and transformed with depth. The fact that FP have been observed in the deep ocean highlights the important role they play in carbon sequestration, however knowledge of the route by which these FP reach the deep ocean is not yet clear. There is a need for comparisons between the composition and characteristics of sinking FP just below the euphotic zone and in the deep ocean to improve our understanding of both

the origin of faecal material reaching the deep ocean and how it is potentially modified by meso- and bathypelagic zooplankton.

Zooplankton FP can make a large contribution to fluxes of FP in the meso- and bathypelagic of the Scotia Sea (e.g. Belcher et al., 2016b; Cavan et al., 2015; Manno et al., 2015). In this region, the transfer of FP through the mesopelagic (as well as the mechanisms controlling their transfer) is therefore a key determinant of the efficiency of the BCP. Here we use Marine Snow Catchers and deep ocean sediment traps in the Scotia Sea, within the Southern Ocean, to collect intact sinking FP in the upper mesopelagic and bathypelagic respectively, and use these data to compare the characteristics of mesopelagic and bathypelagic FP. We compare ~~zooplankton~~ copepod abundances in the upper 200 m with FP fluxes in both the upper mesopelagic and bathypelagic in order to understand the processes controlling the fate of FP produced in the epipelagic. We use these data to determine whether FP arriving in sediment traps in the deep ocean are a result of a direct detrital rain from the surface, or are produced in the mesopelagic via the grazing and repackaging of this material by deep zooplankton populations. We focus in particular on copepod FP as copepods are the numerically dominant zooplankton in our study region, typically comprising >90% of total zooplankton (Ward et al., 2012). ~~Zooplankton FP can make a large contribution to fluxes of FP in the meso- and bathypelagic of the Scotia Sea (e.g. Belcher et al., 2016b; Cavan et al., 2015; Manno et al., 2015). In this region, the transfer of FP through the mesopelagic (as well as the mechanisms controlling their transfer) is therefore a key determinant of the efficiency of the BCP.~~

## 2 Methods

### 2.1 Study site

Sediment traps have been deployed for a number of years at two sites, P2 and P3 (Fig. 1), upstream and downstream of South Georgia (at -55.248 °N, -41.265 °E and -52.812 °N, -39.972 °E respectively) in the Scotia Sea in the Southern Ocean (Manno et al., 2015). The Scotia Sea is mainly located in the eastward flowing Antarctic Circumpolar Current (ACC), which is split by a number of frontal systems including the Southern Antarctic Circumpolar Front (SACCF, Fig. 1). The complex circulation patterns and variability in frontal systems shapes the Scotia Sea ecosystem (Murphy et al., 2007). P3 and P2 are located downstream and upstream of South Georgia respectively, leading to marked differences in community structure with large rapidly sinking diatoms likely to be more prevalent in the iron fertilised downstream region (Korb et al., 2012; Smetacek et al., 2004). Phytoplankton blooms at P3 can be sustained for 3-4 months (Whitehouse et al., 2008), whereas blooms are typically much shorter in the SACCF region where P2 is located (Park et al., 2010), likely influencing the dynamics of the zooplankton community. Variability in regional dispersal or retention by the current systems of the ACC is important for determining the seasonal dynamics of Scotia Sea ecosystems (Murphy et al., 2007; Thorpe et al., 2007).

During cruises in austral spring 2013 (JR291) and 2014 (JR304) aboard the *RRS James Clark Ross*, samples of sinking particles in the upper mesopelagic were collected from using Marine Snow Catchers (MSC) (Table 1) and zooplankton abundance data using Bongo net were collected during cruises in austral spring 2013 (JR291) and 2014 (JR304) aboard the *RRS James Clark Ross* (Table 1). Sediment trap data were obtained from traps deployed in 2012 and 2013 at P2 and P3, at depths of 1,500 m and 2,000 m respectively. The P3 trap (2,000 m depth) was deployed in May 2013 on cruise JR287, and P2 (1,500 m depth) deployed on 8<sup>th</sup> December 2012 on cruise JR280, herein defined as D1. Both traps were recovered in December 2013 on cruise JR291 aboard the *R.R.S. James Clark Ross*. In addition the P2 mooring was redeployed on 7<sup>th</sup> December 2013 and recovered on 28<sup>th</sup> November 2014 during cruise JR304, herein defined as D2. Samples from the spring period (October to January) were analysed for comparison with MSC deployments. Mean current velocities at both sites are <10 m s<sup>-1</sup> (Whitehouse et al., 2012) suggesting effects of lateral advection are minimal and as such they are not considered in this study. Mean current velocities in December 2012 and 2013 (measured with a Nortek Aquadopp current meter deployed just below the ST) were 7.2 and 4.5 cm s<sup>-1</sup>, and, 14.2 and 12.5 cm s<sup>-1</sup> at P3 and P2 respectively. These data agree with mean current velocities at the depth of the ST at both sites of <10 cm s<sup>-1</sup> observed by Whitehouse et al., (2012) in 2008, suggesting that the effects of lateral advection are minimal and as such they are not considered in this study.

## 2.2 Mesozooplankton collection

### 2.2.1 Net sampling

Mesozooplankton samples were collected at both P2 and P3 using a motion-compensating Bongo net (61 cm mouth diameter, 2.8 m long, 200 µm mesh). The net was equipped with solid cod ends, deployed to 200 m and hauled vertically to the surface at 0.22 m s<sup>-1</sup>. Samples were preserved in 4% formalin (w/v) in seawater before being identified to species/taxa using a binocular microscope and staged where appropriate. At least 500 individuals were counted per sample. Counts were converted into ind. m<sup>-2</sup> (0-200 m) based on the area of the Bongo net mouth and the depth of deployment. A total of five deployments were carried out during JR291 and two during JR304. Average abundances for each species/taxa were calculated by averaging all the deployments (from both cruises) at each site. Antarctic krill (*Euphausia superba*) and other large euphausiids were occasionally caught in the Bongo nets, but the Bongo net does not accurately quantify their abundance due to their patchy distribution and net avoidance capabilities. Large euphausiid abundances were therefore not considered, so zooplankton abundances in this study reflect mesozooplankton abundances. In particular, copepod species were overwhelmingly dominant in terms of abundance at our study sites, typically >90% of total zooplankton abundance (Ward et al., 2012). Zooplankton were grouped into: small microcopepod species (*Oithona similis*, *Oncaea sp.* and *Ctenocalanus sp.*) large calanoid copepod species (*Rhincalanus gigas*, *Calanoides acutus*, *Calanus similimus*, *C. propinquus*, *Euchaeta spp.*, and *Metridia spp.*), small euphausiids (all euphausiid species caught in net) and other zooplankton (all remaining species).

## 2.2.2 Prediction of faecal pellet size distribution in epipelagic layers

We predicted the size distribution of FP in the epipelagic layers by using the size distribution of the copepod community assessed via prosome length (PL, mm) (Ward et al. 2012, their table A1) and the known relationship between copepod size and the volume of their FP (FPV,  $\mu\text{m}^3$ ) (Mauchline, 1998; Stamieszkin et al., 2015).

$$\log_{10} FPV = \theta \log_{10}(PL) + \eta \quad (1)$$

We take mean values of  $\theta$  and  $\eta$  of 2.58 and 5.4 respectively from Stamieszkin et al. (2015) derived from literature values of FPV and PL. Using measured copepod abundances, we then calculated the size distribution of FP produced by our population of copepods. We compared the percent abundance in each size class, making the assumption that all copepods were egesting FP at the same rate (see Discussion). As the zooplankton net tows are integrated from the surface to 200 m, there is a slight overlap with the MSC samples, however, as the bulk of zooplankton are found in the upper 100 m (Ward et al., 2014), these net samples are largely representative of the epipelagic layer and we refer to it as such for simplicity. Non-copepod zooplankton (~10 % mesozooplankton abundance) were not considered in this calculation and represent a background error in this approach.

## 2.3 Faecal pellet collection

### 2.3.1 Marine Snow Catcher deployments

Marine Snow Catchers (MSC) were deployed in the upper mesopelagic, defined here as 110 m below the base of the mixed layer depth (MLD) identified from vertical profiles of the water column taken prior to MSC deployments using a Conductivity-Temperature-Depth (CTD) unit (Seabird 9Plus with SBE32 carousel). MSC are large (95 L) PVC closing water bottles, designed to minimise turbulence so particles are more likely to remain intact (Belcher et al., 2016a, 2016b; Cavan et al., 2015; Riley et al., 2012). Once at the appropriate depth, MSC were closed via a mechanical release mechanism, before recovering and leaving on deck for a settling period (2 hours). Following settling, they were drained and particles that sank fast enough to reach the bottom collector tray (“fast sinking” particles (Riley et al., 2012)) were removed from the tray and stored at 2-4°C for further analysis. [All particles collected in the MSC tray were counted as it was not necessary to split the sample.](#) Particles reaching the bottom of the tray that were visible by eye were picked from the tray using a wide bore pipette. Given the MSC height of 1.53 m, particles originating at the top of the MSC are required to sink at a minimum rate of 18.4 m d<sup>-1</sup> to reach the base of the MSC. However, considering measurements of FP sinking velocity in the Southern Ocean of 27 m d<sup>-1</sup> to 1218 m d<sup>-1</sup> (Atkinson et al., 2012; Belcher et al., 2016b; Cavan et al., 2015), this is likely sufficient to capture sinking FP.

### 2.3.2 Sediment trap deployments

Sediment traps (ST) were deployed in the bathypelagic (1500 m to 2000 m). [The P3 trap \(2,000 m depth\) was deployed in May 2013 on cruise JR287, and P2 \(1,500 m depth\) deployed on 8<sup>th</sup> December 2012 on cruise JR280. Both traps were recovered in December 2013 on cruise JR291 aboard the \*R.R.S. James Clark Ross\*. In addition the P2 mooring was redeployed on 7<sup>th</sup> Dec 2013 and recovered on 28<sup>th</sup> November 2014 during cruise JR304. Samples from the spring period \(October to January\) were analysed for comparison with MSC deployments.](#) The ~~ST~~<sup>ST</sup> consisted of a plastic funnel with a baffle at the top (0.5 m<sup>2</sup> surface area), and a narrow opening at the bottom, through which particles fall into 1 L sampling cups (McClane, PARFLUX Mark 78H-21). The traps were programmed so sampling cups would rotate after 14 to 31 days, with shorter periods set to coincide with expected periods of high productivity. Prior to deployment, each cup was filled with a preservative solution of sodium chloride buffered 0.01% Mercuric Chloride. Upon recovery, samples were photographed and the pH recorded. Swimmers, defined as zooplankton that were alive and intact on entering the trap, were picked out using tweezers and removed from the sample. Each sample was then split into a number of equal aliquots (determined by the amount of material in the sample) using a rotary splitter McClane Wet Sample Divider (WSD-10). [Three replicates were analysed for ST FP, with all FP in each replicate counted \(see supplementary table S1 for absolute counts\).](#) Here we focus on ST trap samples in November and December (austral spring) to match MSC and zooplankton net deployments.

### 2.4 Faecal pellet analysis

All FP were photographed using an Olympus SZX16 microscope. FP were classified visually as round, ovoid or cylindrical using light microscopy. All FP in each category collected in the MSC were counted, and their length and width measured using ImageJ. For each ST sample, the dimensions of 10-50 FP of each class were measured [and, for MSC samples, all FP were counted and measured](#). FP volumes were calculated for round, ovoid and cylindrical pellets using the formula for a sphere, ellipsoid and cylinder respectively. Equivalent spherical diameters (ESD) were also calculated. We compare FP volume rather than FP number to avoid bias due to possible fragmentation (Wexels Riser et al., 2010). The carbon contents of FP were calculated based on conversion factors of 0.035, 0.052 and 0.030 mg C mm<sup>-3</sup> for round, ovoid and cylindrical FP respectively based on measurements made on FP collected from the ST in spring-early autumn (Manno et al., 2015).

Without faecal production experiments of isolated species, it is difficult to ascertain the exact origin of FP collected in the MSC and ST. Previous studies (González, 1992; González et al., 1994a; González and Smetacek, 1994; Martens, 1978; Wilson et al., 2008; Yoon et al., 2001) suggest that ovoid/ellipsoidal pellets originate from copepods, pteropods and larvaceans, cylindrical pellets from krill and copepods, and spherical pellets from amphipods, small copepods and crustacean nauplii.



## 2.5 Faecal pellet sinking velocities and fluxes

Sinking velocities ( $w$ ) of a sample of FP collected in MSC were measured on board on both cruises. During JR291, sinking velocities were measured in a graduated glass cylinder in a temperature controlled laboratory (2°C). For each FP, the sinking velocity was calculated from the average of the time taken to sink past two marked distances (10 cm apart), with the starting point more than 10 cm from the water surface. During JR304, sinking velocities were measured in a temperature controlled (at 4°C) flow chamber system (Ploug and Jorgensen, 1999), suspending FP in an upward flow and taking the average of three measurements. Only FP larger than 0.15 mm ESD (i.e. those visible by eye) could be measured. No significant differences were found between sinking velocities measured during JR291 and JR304 by these two different methods (Student's t-test,  $p=0.2$ ).

The median sinking velocity of measured FP for each MSC was utilised to calculate the sinking FP flux ( $FPF$ ).

$$FPF (n FP m^{-2} d^{-1}) = \frac{n_{FP}}{A} \times \frac{w}{h} \quad (2)$$

Here,  $n_{FP}$  is the total number of FP collected at the base of the MSC (excluding krill FP),  $A$  the area of the MSC opening based on inner MSC diameter, and  $h$  the height of the snow catcher (1.53 m).

For sediment trap samples, FP fluxes were calculated as follows:

$$FPF (n FP m^{-2} d^{-1}) = n_{FP} / (A/d), \quad (3)$$

where  $d$  is the number of days that the trap was open (15 days) and  $A$  is the area of the sediment trap (0.5 m<sup>2</sup>).

## 2.6 Faecal pellet comparisons

FP collected in the ST and MSC were compared in terms of the number of FP in each morphological type as well as in terms of carbon. As the absolute number of FP was vastly different between MSC and ST samples due to attenuation with depth, we compared the percentage abundance and carbon across the size distribution of all FP from measured FP volumes. As only an average FP size for each morphological type (rather than for all individual FP) was measured for samples from the ST deployments ~~D1 and D2~~, we make use of historical sediment trap data (Manno et al., 2015) at the same sites from [December 2009 and 2010](#) ~~(herein referred to as H2009 and H2010)~~. The size of all FP in each sample-split were measured in the study of Manno et al. (2015) ~~allowing us to~~ [and hence we use these data to](#) compare size distributions of MSC and ST collected FP. Manno et al. (2015) also categorised FP into ovoid, cylindrical and round, with an additional category of elliptical. We combine cylindrical and elliptical categories due to their similar morphology and to allow comparison with our MSC data. Although this introduces uncertainty in terms of inter-annual variability between 2009-2010 (full sediment trap data) and 2013-2014 (Marine Snow Catcher data), consistency in the FP types and percentages in each category between years (Fig.



220 S2) provides confidence in the use of these historical data. Numbers of large cylindrical FP, probably originating from large  
221 euphausiids, were removed from counts given the large potential bias in the quantification of these organisms in the net  
222 samples. Again we ~~take~~ took into account only the spring data (November and December).

## 223 2.7 Statistics

224 In order to estimate error uncertainty, we take the standard error of our measurements, i.e. multiple Bongo net tows for  
225 zooplankton, multiple MSC deployments for mesopelagic FP, and multiple ST deployments for bathypelagic FP. We  
226 compare zooplankton size distributions using a Kolmogorov-Smirnov test. FP size distributions (in terms of % abundance)  
227 are also compared using an Anderson-Darling k-sample test as this test is more sensitive to differences in the tails and  
228 differences in shift, scale and symmetry when means are similar (Engmann and Cousineau, 2011). All statistics were carried  
229 out in RStudio (version 0.98.1091; R development core team, 2014).

## 230 3. RESULTS

### 231 3.1 Zooplankton community and faecal pellet production

232 On average, total zooplankton abundances and species compositions were similar at P2 and P3 (Fig. 2), with small  
233 microcopepod species *Oithona similis*, *Oncaea sp.* and *Ctenocalanus sp.* outnumbering the main large calanoid copepod  
234 species (*Rhincalanus gigas*, *Calanoides acutus*, *Calanus similimus*, *C. propinquus*, *Euchaeta spp.*, and *Metridia spp*) (Table  
235 S1, Fig. 2). The number of zooplankton with PL <-2 mm was is-similar at P2 and P3 (ratio P3:P2 of 1.1), but the abundance  
236 of larger copepods (4-7 mm PL) at P3 was almost double that of P2 (ratio P3:P2 of 1.8) (Fig. S1).

237  
238 The predicted size distribution of egested FP from our mesozooplankton copepod community highlights that most FP  
239 egested in the epipelagic would be in the smallest size category <0.001 mm<sup>3</sup> (97.6 ± 20.3% and 97.0 ± 4.0% at P2 and P3  
240 respectively) with low contributions (<2%) from each of the larger FP size categories (Fig. 3a). The high standard error of  
241 FP <0.001 mm<sup>3</sup> at P2 is in part due to very high abundances of *Oithona similis* during one deployment. Removing this net  
242 from the average gives 97.8±13.7% FP<0.001 mm<sup>3</sup>. The predicted size distributions of FP at P2 and P3 were not  
243 significantly different ( $p>0.5$ , Mann-Whitney U-test, Kolmogorov-Smirnov test, and Anderson-Darling k-sample test).

### 244 3.2 Sinking faecal pellets

245 Sinking faecal pellets collected by the MSC (upper mesopelagic) and the ST (bathypelagic) are described in terms of size  
246 and shape to assess changes between these two layers.

### 3.2.1 Faecal pellet shape

The morphologies of FP captured by the MSC at P2 were heterogeneous (Fig. 4, Fig. 5a), with cylindrical/elliptical FP, and round FP making up similarly high percent contributions to the total number of FP. Conversely, a single morphology dominated in the P3 MSC samples which were cylindrical FP of  $<0.005 \text{ mm}^3$  (Fig. 5c).

All morphological classes found in the upper mesopelagic (MSC samples) were also present in the bathypelagic (ST samples, Fig. 4). However, the dominant type of FP changed between these two layers (Fig. 5). Ovoid FP made only low contributions ( $<8.3\%$  and  $<1.4\%$  at P2 and P3 respectively) to total FP abundance in the MSC samples but were the dominant type in most size categories in the ST samples (up to  $25.2\%$  and  $13.1\%$  at P2 and P3 respectively, Fig. 5).

### 3.2.2 Faecal pellet size

The predicted FP size distributions of pellets produced in the epipelagic by the net caught ~~zooplankton~~ copepod community were significantly different to those observed in the upper mesopelagic (MSC samples) at both P2 and P3 (Kolmogorov-Smirnov test,  $D=0.58$  (P2),  $D=0.67$  (P3),  $DF=11$ ,  $p<0.01$ ). Comparison of Fig. 3a and b reveals that there was a reduced dominance of the smallest FP ( $0-0.001 \text{ mm}^3$ ) from  $>96 \pm <20\%$  to  $<18 \pm <5\%$  between the two layers at both sites.

A further loss in the smaller FP size categories is apparent between the upper mesopelagic MSC samples and the bathypelagic ST samples (Fig. 3c). FP  $<0.003 \text{ mm}^3$  in volume decreased from  $35.5 \pm 13.4\%$  to  $5.0 \pm 0.4\%$  at P2 and from  $52.3 \pm 6.7\%$  to  $14.0 \pm 5.7\%$  at P3. Based on size alone, the FP community appears to have become less diverse in the bathypelagic layer, with most FP ( $>80\%$ ) occupying a narrower size range in the ST samples, ( $0.003-0.01 \text{ mm}^3$ ) compared to the MSC samples ( $0.001-0.02 \text{ mm}^3$ ). FP size distributions in the MSC and ST were not however significantly different at either P2 or P3 (Anderson-Darling k-sample test,  $T.AD=1.3$ ,  $DF=11$ ,  $p=0.2$  and  $T.AD=0.43$ ,  $DF=11$ ,  $p=0.9$  at P2 and P3 respectively). Re-running the test for only FP size categories  $<0.003 \text{ mm}^3$  highlights a significant difference in the %FP abundance in the smaller size categories between the MSC and ST ( $p=0.03$  at both P2 and P3).

### 3.3 Faecal pellet carbon

Although small FP were numerically dominant in the MSC, comparison of Fig. 5 and Fig. 6 reveals higher contributions of the larger FP size classes to total FP carbon (FPC). This is not unexpected as larger FP contain a larger amount of carbon. FPC data highlight the importance of the loss of large FP to the carbon sinking through the water column. Although abundances of small FP greatly reduced with depth, this does not represent such a large change in terms of carbon.

### 3.4 Faecal pellet sinking velocities and fluxes

Sinking velocities of FP (~~excluding krill FP~~) collected in the MSC ranged from 52 to 382 m d<sup>-1</sup> at P2 and 13 to 227 m d<sup>-1</sup> at P3, reflecting the range in FP shapes and sizes. Generally small FP had lower sinking velocities than larger FP. ~~During cruise JR291, we measured FP sinking rates (excluding krill FP) of 47-120 m d<sup>-1</sup> for FP <0.002 mm<sup>3</sup>, and 36-270 m d<sup>-1</sup> for FP >0.02 mm<sup>3</sup>. (supplementary table S2). Rates measured in this study are consistent~~ agree with the range of 5-220 m d<sup>-1</sup> given by (Turner, (2002) for copepod FP. ~~During cruise JR304, FP sinking rates were 47-51 m d<sup>-1</sup> and 36-270 m d<sup>-1</sup> for FP <0.002 mm<sup>3</sup> and FP >0.02 mm<sup>3</sup> respectively.~~

At P3, the flux of cylindrical and elliptical FP in the MSC was an order of magnitude higher than fluxes of round or ovoid FP (190,716 FP m<sup>-2</sup> d<sup>-1</sup> compared to 32,172 FP m<sup>-2</sup> d<sup>-1</sup>). Similarly a ~~whereas, at~~ P2, cylindrical and elliptical FP were the ~~the~~ dominant FP type (21,128 FP m<sup>-2</sup> d<sup>-1</sup>), but fluxes of round FP were also important (14,596 FP m<sup>-2</sup> d<sup>-1</sup>) at this site ~~of a similar magnitude~~ (Table 2). FP fluxes in the ST were dominated by ovoid FP at both sites (Table 2).

## 4. DISCUSSION

In this study we compare predicted size distributions of FP produced by the ~~zooplankton (mainly copepod)~~ copepod community in the epipelagic, to those of sinking FP in the upper mesopelagic (from MSC) and the bathypelagic (from ST) in order to determine the fate of FP sinking through the mesopelagic and assess the importance of deep dwelling zooplankton on the efficiency of the BCP in the Southern Ocean.

### 4.1 Changes in faecal pellet with depth: upper mesopelagic

Our data suggest that small FP are not transferred efficiently from the epipelagic to the meso- and bathypelagic, and hence make a small contribution to FP fluxes at depth, particularly in terms of carbon. Comparison of estimated copepod FP production with measurements of sinking FP in the upper mesopelagic (from MSC) gives an indication of the degree of retention in that layer. The community at both P2 and P3 was dominated by microcopepod species which, based on their size, produce small FP which are expected to sink more slowly than large FP (Komar et al., 1981; Small et al., 1979; Stamieszkin et al., 2015). Agreeing with the data presented here, small FP (<0.002 mm<sup>3</sup>) are predicted to have a sinking velocity three times slower than larger FP (>0.02 mm<sup>3</sup>) based on the empirical relationship of Small et al. (1979) for copepod FP.

The longer residence time of small FP in the upper ocean (due to their slower sinking velocities) means they are exposed to remineralisation processes such as coprophagous feeding, fragmentation and microbial remineralisation, for a longer period of time. This type of retention filter and low export efficiency of small FP has been observed in a number of oceanographic environments (e.g. Dagg et al., 2003; Viitasalo et al., 1999; Wexels-Riser et al., 2001). Wexels Riser et al. (2010) made

306 observations over the upper 200 m of a Norwegian fjord, finding that large FP produced by *Calanus finmarchicus*  
307 contributed disproportionately to vertical flux despite large numbers of small FP produced by *Oithona similis*, agreeing well  
308 with the loss of small FP that we observed in the Scotia Sea.

309  
310 It is important to acknowledge here, that although the 200  $\mu\text{m}$  mesh used in this study is commonly used in zooplankton  
311 surveys, this leads to an underestimation of the smaller zooplankton size classes present in the epipelagic. Ward et al., (2012)  
312 found that a 53  $\mu\text{m}$  mesh caught 5.87 times more zooplankton than a 200  $\mu\text{m}$  net in the upper mesopelagic of the northern  
313 Scotia Sea in spring. However, in this study an underestimation of the small zooplankton size classes serves to reinforce the  
314 fact that small FP dominate the flux of FP out of the epipelagic and are largely attenuated as they pass through the  
315 mesopelagic.

316  
317 Comparison of freshly egested FP size distributions with the size distributions of FP sinking through the mesopelagic relies  
318 here on the assumption that different species within the copepod community had the same rates of egestion. FP production  
319 varies with species, as well as factors such as season and food availability; the range in FP production rates between different  
320 copepod species across a number of high latitude studies is 2-48 FP ind.d<sup>-1</sup> (Dagg et al., 2003; Daly, 1997; Roy et al., 2000;  
321 Thibault et al., 1999; Urban-Rich et al., 1999). However, as the estimated abundance of egested FP in the smallest size  
322 category (0-0.001 mm<sup>3</sup>) is between 60-250 times greater than the next largest category, the smallest FP are still likely to  
323 dominate the FP community even if egestion rates are varied within reasonable bounds. Therefore, despite our assumptions  
324 regarding rates of egestion, our conclusion of rapid attenuation of these small FP in the upper mesopelagic remains valid.

#### 325 **4.2 Changes in faecal pellet with depth: meso- to bathypelagic**

326 Our data reveal a change in FP size, shape and abundance between the upper mesopelagic and bathypelagic of the Scotia Sea  
327 suggesting in situ FP production by deeper dwelling zooplankton. The occurrence of intact and fresh FP in deep sediment  
328 traps in the Southern Ocean (e.g. Accornero et al., 2003; Manno et al., 2015) may therefore be a result of an indirect,  
329 cascade-like transfer through the mesopelagic as they are reprocessed by different zooplankton communities (Miquel et al.,  
330 2015; Urrere and Knauer, 1981).

331  
332 Urrere and Knauer (1981) deployed free-floating traps off the Monterey Peninsula in California. They observed a decrease in  
333 numerical FP fluxes in the upper 500 m, but FP fluxes increased by a factor of 2.7 from 500 m to 1500 m. This increase was  
334 largely due to elliptical FP, suggesting the presence of deep resident (or overwintering) zooplankton populations (Urrere and  
335 Knauer, 1981). The authors conclude that organic material reaches the deep ocean (supporting deep resident zooplankton  
336 populations) through in situ repackaging of detritus and via heterotrophy as well as inputs from migrating populations,  
337 emulating the “ladder of migrations” first proposed by Vinogradov (1962). More recently, Miquel et al. (2015) deployed  
338 drifting sediment traps in the upper 210 m of the Beaufort Sea, observing increases in elliptical FP with depth and decreases

339 in cylindrical FP. They explain this by the presence of omnivorous and carnivorous zooplankton in the mesopelagic, whose  
340 primary food sources are the vertical flux of organic matter and other organisms. In agreement with our observations, Suzuki  
341 et al. (2003) observed large declines in cylindrical FP between sediment traps deployed at 537 and 796 m in the marginal ice  
342 zone of Antarctica, and increases in elliptical FP over the same depth range. They suggest that coprophagous feeding and  
343 new FP production can explain some of the loss of cylindrical FP, with fragmentation into small sinking particles explaining  
344 the rest. As different zooplankton species produce different shapes of FP, a change in FP shape [can](#) suggests a change in  
345 zooplankton community structure.

346  
347 At both P2 and P3 we saw an increase in the contribution of ovoid FP to the total number of FP between the upper  
348 mesopelagic (MSC samples) and bathypelagic (ST samples), increasing by factors of 4.5 and 8.5 at P2 and P3 respectively.  
349 This suggests that there is either an input of ovoid FP at depth, or that cylindrical-elliptical and round FP are preferentially  
350 remineralised in the mesopelagic. We made both size and shape measurements of FP in the upper mesopelagic and  
351 bathypelagic, allowing us to discern if there is indeed production of new ovoid FP at depth. At both P2 and P3, we observed  
352 size classes of ovoid FP in the ST (0.003-0.008 mm<sup>3</sup>) that were not present in the MSC, which rules out selective  
353 remineralisation. Furthermore, the intact shape of ovoid FP in the ST argues against fragmentation as a cause of this change  
354 in size distribution. In agreement with Manno et al. (2015), we observed that ovoid FP in the ST showed fewer signs of  
355 fragmentation and were more intact than cylindrical or elliptical FP at both P2 and P3. Estimates of FPC in ST samples  
356 indicates that these ovoid FP also make a large contribution to the flux of POC and, as such, their production at depth  
357 represents a mechanism for long term storage of carbon in the ocean. Hence, we conclude that FP fluxes to depth are  
358 augmented by FP produced in situ at depth.

359  
360 We can estimate the size class of zooplankton producing the FP we find at depth based on the FP size class and Equation 1.  
361 We estimate that zooplankton of PL 2.6-3.8 mm and 2.6-3.2 mm could have produced the FP we observed in the ST, based  
362 on dominant size classes of FP of 0.003-0.008 mm<sup>3</sup> and 0.003-0.005 mm<sup>3</sup> at P3 and P2 respectively. Of the species within  
363 these size classes recorded in the Bongo net tows at P2 and P3, *Calanoides acutus* IV and *Metridia gerlachei* adults were the  
364 most abundant and may be responsible for the flux of these FP to the ST. *C.acutus* is a known seasonal migrator in the  
365 region, occurring in the upper 200 m in summer but residing deeper (~200–600 m) in spring (Ward et al., 2012). *Metridia*  
366 *spp.* are also known migrators (Ward et al., 1995, 2006b; Ward and Shreeve, 1999), found to be one of the more abundant  
367 species in the 500-1000 m depth range based on *Discovery Investigations* to the west of the Drake Passage (Ward et al.,  
368 2014). Ward et al. (2014) find the most abundant species in this depth range to be *Oncaea spp.*, *Oithona frigida* and  
369 *Microcalanus pygmaeus*, all of which are too small ( $\leq 0.5$  mm PL) to produce the larger FP that were dominant in the ST.  
370 Similar to the situation in the epipelagic and upper mesopelagic, we suggest that although small species are more abundant,  
371 they produce small FP which sink slowly and are rapidly remineralised. It is likely that it is the less abundant larger  
372 carnivores and recyclers in the lower mesopelagic that are contributing more to the flux of carbon to the deep ocean through

the production of large FP, agreeing with the modelling study of Stamieszkin et al., (2015). Calanoid copepod families *Aetideidae*, *Heterorhabdidae*, *Metridinidae* and *Euchaetidae* are also common in the mesopelagic of the Scotia Sea and surrounding area (Laakmann et al., 2009; Ward et al., 1995; Ward and Shreeve, 1999), and are of an appropriate size (as adults or other copepodite stages) to produce the larger FP that were dominant in the ST. Although we can only speculate as to the possible producers of FP in the ST, it is clear that appropriately sized zooplankton are sufficiently abundant in the mesopelagic to influence the flux of FP to the ST.

When comparing datasets collected via different methods (in this case Bongo nets, MSC and ST), it is important to consider the different time and space scales over which they measure. The zooplankton Bongo net samples integrated vertically over the top 200 m and temporally over the period over which replicate samples were taken (a few days at each site for both cruises). MSC samples were an instantaneous snapshot of the particle flux and, at a deployment depth of 110 m below the mixed layer, they integrate over spatial scales of tens of kilometres (based on median sinking rates at P2 and P3 and a current speed of 10 cm s<sup>-1</sup>). Conversely, ST samples captured the flux over a 15 day period and at a deployment depth of 1500 and 2000 m had a potential sample collection area on spatial scales of hundreds of kilometres (based on the same conditions). If zooplankton communities vary significantly over tens of kilometres then this would reduce the direct comparability of MSC and ST data. Previous studies in the region suggest that much of the Scotia Sea is populated by a single zooplankton ‘community’, but there are regional differences in the stage of phenological development. (Ward et al., 2006a), implying that the species composition may not vary on short spatial scales. Changes in the species stage are likely tied to changes in phytoplankton productivity, as for much of the time, Southern Ocean zooplankton are food limited (Ward et al., 2006a). Cluster analysis of phytoplankton in the Scotia Sea reveals distinct communities (in terms of abundance, community structure and productivity) on spatial scales of hundreds of kilometres (Korb et al., 2012), and hence we would not expect significant changes in the stage-structure of zooplankton on the spatial resolution of the MSC, making these results more comparable to those of the ST. The high sinking rates of zooplankton FP means that their occurrence in ST is representative of the conditions directly above the ST (Buesseler et al., 2007). Slow-sinking particles spread out more as they sink which increases our uncertainty in depth comparisons of smaller FP. However, the spatial scale of zooplankton variability at our study site means that slow-sinking FP particles reaching the ST likely reflect the same zooplankton community structure as occurring directly above the ST. For each of our three methods (nets, MSC and ST), we take averages over multiple years which should also reduce the uncertainties associated with the various spatial and temporal resolutions of the three methods. However, we acknowledge that the different spatial and temporal scales of measurement could also contribute to some of the vertical changes in FP shape and size structure that we observed.

### 4.3 Role of meso- and bathypelagic zooplankton

Our data suggest that zooplankton residing below the euphotic layer repackage sinking detritus and produce FP which are able to pass through the lower mesopelagic and be collected in ST in the bathypelagic. Observations made at P2 and P3 in autumn show that, during the night, the highest zooplankton abundances are in the upper 125 m (C.Liszka pers. comm.). However corresponding daytime surface abundances are typically lower which may be partially explained by certain species that migrate vertically in the water column (C.Liszka pers. comm.). We suggest that diel vertical migrators may contribute to the relatively fresh FP we found at depth. A modelling study by Wallace et al. (2013) suggests that FP penetrate deeper in the water column when there is zooplankton vertical migration, with the deepest FP production occurring when zooplankton undertake diel vertical migrations rather than foray type feeding (multiple ascents and descents during a day). Resident zooplankton populations were observed below 150 m depth, with a peak at 375-500 m, most notably at P3 (C.Liszka pers. comm.), suggesting that the deeper parts of the community, consisting of non-migrators~~ing, or seasonally~~ or ontogenetically migrat~~ors~~ing, community are also important at our study site and could repackage organic material in the upper mesopelagic, and may have produced~~eing~~ some of the intact FP which we observed in our ST.

The abundance of zooplankton typically declines rapidly over the upper 1000 m of the water column (Ward et al., 1995, 2014; Ward and Shreeve, 1999), suggesting that any new FP production below the depth of our MSC samples is likely to take place in the upper to mid mesopelagic where zooplankton abundances are higher. ~~Although~~ Zooplankton are more concentrated in the epipelagic, however, the total abundance of zooplankton in the meso- and bathypelagic can be high due to the large depth extent of these layers. In the Antarctic Zone (to the west of our study site), of Ward et al., (2014), found that the -total depth integrated zooplankton abundances in the 250-2000 m horizon (~~extending~~ extrapolating abundances recorded at 750-1000 m down to 2000 m) ~~in the Antarctic Zone (to the west of our study site)~~ is about three quarters (0.74) of the ~~number of~~ zooplankton abundance in the top 250 m (~~Ward et al., 2014~~). Therefore it is likely that there is still substantial production of FP in the lower mesopelagic, and ~~FP~~ compared to FP produced in the epipelagic, FP produced in the lower mesopelagic~~produced here~~ are subject to remineralisation processes over a shorter distance, so are more likely to reach the deep ocean intact.

Despite the similarities in copepod abundances at P2 and P3, the numbers of FP collected at P3 were an order of magnitude higher than at P2. Surface phytoplankton productivity at P3 is typically much higher than at P2, with large blooms occurring in most years (Borrione and Schlitzer, 2013; Korb et al., 2008, 2012). This may in part explain higher FP fluxes at the P3 site, as in good feeding conditions (such as those measured during JR304 (Belcher et al., 2016b)) FP production rates have been shown to be higher (Besiktepe and Dam, 2002; Butler and Dam, 1994). The zooplankton community structure may also affect the fate of FP in the mesopelagic. Previous studies have found relationships between POC export and the presence of microcopepod species, suggesting that low POC export may be attributed to coprophagy and/or coprorhexy (Suzuki et al.,



2003; Svensen and Nejstgaard, 2003). More recently, several studies have proposed that the main role of small zooplankton species may be to fragment FP rather than ingest them (Iversen and Poulsen, 2007; Poulsen and Kiørboe, 2005; Reigstad et al., 2005). Regardless of the mechanism, previous studies agree that high microcopepod abundances can lead to increased FP retention. The [ratio of small copepods to large calanoids is higher at P2](#) ~~increased abundance of small copepods (compared to larger calanoids) at P2~~ (Figure 2), [which](#) may result in greater losses of FP in the epi- and mesopelagic, resulting in lower numbers of FP captured in our MSC and ST at P2. Indeed, we see higher attenuation of FP fluxes at P2 than P3 between our measurement depths (Table 2).

The flux of FP reaching the deep ocean therefore depends not only on surface production, but also on the meso- and bathypelagic zooplankton populations and the balance between FP retention and FP production. ~~For instance, if the deep zooplankton community at P3 are larger in size than those at P2, this could explain the larger size of FP observed in the ST at P3 as well as contributing to higher numbers of FP here due to increased sinking velocities of larger FP (Komar et al., 1981; Small et al., 1979; Stamieszkin et al., 2015).~~ ~~Although our data implies that in situ FP production in the mesopelagic accounted for additional fluxes of FP to the bathypelagic at both P2 and P3.~~ ~~However as there is, the~~ the potential for further working ~~fragmentation and remineralisation and fragmentation~~ of FP produced in the mesopelagic ~~, the gross deep FP production cannot be quantified here.~~ ~~means we are not able to quantify this deep FP production.~~ We therefore cannot determine whether higher FP fluxes at P3 are due primarily to reduced [FP](#) attenuation or to increased FP production at depth ~~;~~ [most likely a combination of both mechanisms is taking place. Previous work in the region, has however found that](#) ~~h~~ ~~in~~ ~~however at least in~~ the upper mesopelagic (mixed layer depth-200 m) FP attenuation is higher at P2 than P3 (Belcher et al., 2016b). ~~We cannot rule out that a combination of both is occurring.~~

~~We present here a~~ [Our](#) comparison of FP size, shape and abundance in the upper mesopelagic and lower bathypelagic [agrees](#) ~~;~~ ~~suggesting, in agreement with previous hypotheses~~ ~~-(Accornero et al., 2003; Manno et al., 2015; Suzuki et al., 2003).~~ ~~that~~ ~~allowing us to verify previous hypotheses of~~ in situ FP production ~~and vertical migrations might be important in~~ ~~ing~~ the flux of FP to depth in the Southern Ocean ~~-(Accornero et al., 2003; Manno et al., 2015; Suzuki et al., 2003).~~ We find that the occurrence of intact FP in deep ST ~~could~~ ~~an~~ be explained by both vertical migrations of zooplankton, and repackaging and in situ FP production by meso- and bathypelagic zooplankton populations (Fig. 7). ~~The route by which the FP are transferred to depth is a key control on the amount of carbon reaching this depth.~~ Taking an integrated surface production of  $1 \text{ g C m}^{-2} \text{ d}^{-1}$  (based on measurements by Korb et al. (2012) to the northwest of South Georgia), and assuming ~~that FP reaching the deep ocean via vertical migration are only~~ [an assimilation efficiency](#) ~~assimilated (with efficiency~~ of 66% (Anderson and Tang, 2010; Head, 1992)) ~~-during vertical migration~~ ~~one~~ (left panel Fig. 7, ~~Case A~~ [Scenario 1](#)), we calculate that up to  $340 \text{ mg C m}^{-2} \text{ d}^{-1}$  could reach the depth of migration [\(this depth will vary both between species and seasonally\)](#). In comparison, if [FP are repackaged multiple times on their transit through the mesopelagic then FP will be assimilated multiple times, resulting in reduced transfer of carbon when compared to diel vertical migration.](#) ~~For example, if we assume~~

FP ~~that undergoing repackaging in the mesopelagic~~ are assimilated twice over the same vertical distance as a typical depth range as the vertical migration (right panel, Fig. 7, Case B Scenario 2), result in up to 115 mg C m<sup>-2</sup> d<sup>-1</sup> ~~could reaching~~ the same depth. The exact difference in carbon transfer between these two routes (Case A and B Scenario 1 and 2) will depend on the number of repackaging steps over the migration depth, specific assimilation efficiencies of the repackaging copepods as well as loss of FP carbon via degree of microbial remineralisation occurring during FP sinking between repackaging cycles. However, these calculations highlight that ~~(The route by which the FP are transferred to depth is a key control on the amount of carbon reaching this depth. These estimates are within the range of estimates of POC flux made in the upper mesopelagic at P2 and P3 (Belcher et al., 2016b), but are over an order of magnitude higher than POC fluxes measured in the ST (Manno et al., 2015), implying that material reaching the ST may have been repackaged many times. The exact difference in carbon transfer between these two routes (Case A and B) will depend on the number of repackaging steps, specific assimilation efficiencies of the repackaging copepods as well as degree of microbial remineralisation occurring during FP sinking between repackaging cycles.~~ Regardless of the feeding mode of these mesopelagic zooplankton communities (detritivory, omnivory or carnivory), production of FP at depth via both the aforementioned scenarios supports the transfer of intact FP to the deep ocean, supporting the sequestration of carbon on long timescales. There is therefore a need to link meso- and bathypelagic zooplankton communities (particularly the larger size classes) to carbon fluxes within global biogeochemical models by refining the contribution of different zooplankton size classes to carbon fluxes via their differential FP production rates and sinking speed.

## Acknowledgements

We would like to thank the crew, officers and scientists aboard the *R.R.S. James Clark Ross* during research cruises JR291 and JR304. Particular thanks to Elena Ceballos Romero, Fred le Moigne, Andy Richardson, and Manon Duret for their invaluable help with marine snow catcher deployments. Thanks to Cecilia Liszka for providing information on the deep mesozooplankton community at our study site. Fieldwork was supported by a NERC AFI Collaborative Gearing Scheme grant to Stephanie Henson. Geraint A. Tarling and Clara Manno were supported by the Ocean Ecosystems programme at British Antarctic Survey.

## References

- Accornero, A., Manno, C., Esposito, F. and Gambi, M. C.: The vertical flux of particulate matter in the polynya of Terra Nova Bay . Part II . Biological components, *Antarct. Sci.*, 15(2), 175–188, doi:10.1017/S0954102003001214, 2003.
- Anderson, T. R. and Tang, K. W.: Carbon cycling and POC turnover in the mesopelagic zone of the ocean : Insights from a simple model, *Deep. Res. Part II*, 57(16), 1581–1592, doi:10.1016/j.dsr2.2010.02.024, 2010.
- Atkinson, A., Schmidt, K., Fielding, S., Kawaguchi, S. and Geissler, P. A.: Variable food absorption by Antarctic krill:

Relationships between diet, egestion rate and the composition and sinking rates of their fecal pellets, *Deep Sea Res. Part II Top. Stud. Oceanogr.*, 59–60, 147–158, doi:10.1016/j.dsr2.2011.06.008, 2012.

Azam, F., Frenchel, T., Field, J. G., Gray, J. S., Meyer-Reil, L. A. and Thingstad, F.: The ecological role of water-column microbes in the sea, *Mar. Ecol. Prog. Ser.*, 10, 257–263, doi:10.3354/meps010257, 1983.

Belcher, A., Iversen, M., Giering, S., Riou, V., Henson, S. and Sanders, R.: Depth-resolved particle associated microbial respiration in the northeast Atlantic, *Biogeosciences*, 13, 4927–4943, doi:10.5194/bg-2016-130, 2016a.

Belcher, A., Iversen, M. H., Manno, C., Henson, S. A., Tarling, G. A. and Sanders, R.: The role of particle associated microbes in remineralization of fecal pellets in the upper mesopelagic of the Scotia Sea, Antarctica, *Limnol. Oceanogr.*, 61(3), 1049–1064, doi:10.1002/lno.10269, 2016b.

Besiktepe, S. and Dam, H. G.: Coupling of ingestion and defecation as a function of diet in the calanoid copepod *Acartia tonsa*, *Mar. Ecol. Prog. Ser.*, 229(I), 151–164, doi:10.3354/meps229151, 2002.

Bodungen, von B., Fischer, G., Nothing, E. M. and Wefer, G.: Sedimentation of krill faeces during spring development of phytoplankton in the Bransfield Strait, Antarctica, *Mitteilungen aus dem Geol. un Paläontologischen Inst. der Univ. Leipzig*, 62, 243–235, 1987.

Borrione, I. and Schlitzer, R.: Distribution and recurrence of phytoplankton blooms around South Georgia, Southern Ocean, *Biogeosciences*, 10(1), 217–231, doi:10.5194/bg-10-217-2013, 2013.

Buesseler, K. O., Antia, A. N., Chen, M., Fowler, S. W., Gardner, W. D., Gustafsson, O., Harada, K., Michaels, A. F., Rutgers van der Loeff, M., Sarin, M., Steinberg, D. K. and Trull, T.: An assessment of the use of sediment traps for estimating upper ocean particle fluxes, *J. Mar. Res.*, 65(3), 345–416, doi:10.1357/002224007781567621, 2007.

Butler, M. and Dam, H. G.: Production rates and characteristics of fecal pellets of the copepod *Acartia tonsa* under simulated phytoplankton bloom conditions: implications for vertical fluxes, *Mar. Ecol. Prog. Ser.*, 114, 81–91, doi:10.3354/meps114081, 1994.

Carroll, M. L., Miquel, J.-C. and Fowler, S. W.: Seasonal patterns and depth-specific trends of zooplankton fecal pellet fluxes in the Northwestern Mediterranean Sea, *Deep Sea Res. Part I Oceanogr. Res. Pap.*, 45(8), 1303–1318, doi:10.1016/S0967-0637(98)00013-2, 1998.

Cavan, E. L., Le Moigne, F., Poulton, A. J., Tarling, G. A., Ward, P., Daniels, C. J., G, F. and Sanders, R. J.: Attenuation of particulate organic carbon flux in the Scotia Sea, Southern Ocean, controlled by zooplankton fecal pellets, *Geophys. Res. Lett.*, 42(3), 821–830, doi:10.1002/2014GL062744, 2015.

Clarke, A., Quetin, L. B. and Ross, R. M.: Laboratory and field estimates of the rate of faecal pellet production by Antarctic krill, *Euphausia superba*, *Mar. Biol.*, 98(4), 557–563, doi:10.1007/BF00391547, 1988.

Dagg, M. J., Urban-Rich, J. and Peterson, J. O.: The potential contribution of fecal pellets from large copepods to the flux of biogenic silica and particulate organic carbon in the Antarctic Polar Front region near 170°W, *Deep Sea Res. Part II Top. Stud. Oceanogr.*, 50(3–4), 675–691, doi:10.1016/S0967-0645(02)00590-8, 2003.

Daly, K. L.: Flux of particulate matter through copepods in the Northeast Water Polynya, *J. Mar. Syst.*, 10(1–4), 319–342,

doi:10.1016/S0924-7963(96)00062-0, 1997.

Engmann, S. and Cousineau, D.: Comparing distributions: The two-sample Anderson-Darling test as an alternative to the Kolmogorov-Smirnoff test, *J. Appl. Quant. methods*, 6(3), 1–17, 2011.

Fowler, S. W., Small, L. F. and La Rosa, J.: Seasonal particulate carbon flux in the coastal northwestern Mediterranean Sea , and the role of zooplankton fecal matter, *Oceanol. Acta*, 14(1), 77–85, 1991.

Gleiber, M. R., Steinberg, D. K. and Ducklow, H. W.: Time series of vertical flux of zooplankton fecal pellets on the continental shelf of the western Antarctic Peninsula, *Mar. Ecol. Prog. Ser.*, 471, 23–36, doi:10.3354/meps10021, 2012.

González, H. E.: The distribution and abundance of krill faecal material and oval pellets in the Scotia and Weddell Seas (Antarctica) and their role in particle flux, *Polar Biol.*, 12, 81–91, doi:10.1007/BF00239968, 1992.

González, H. E. and Smetacek, V.: The possible role of the cyclopoid copepod *Oithona* in retarding vertical flux of zooplankton faecal material, *Mar. Ecol. Prog. Ser.*, 113(1982), 233–246, 1994.

González, H. E., Kurbjeweit, F. and Bathmann, U. V: Occurrence of cyclopoid copepods and faecal material in the Halley Bay region, Antarctica, during January-February 1991, *Polar Biol.*, 14(5), 331–342, doi:10.1007/BF00238449, 1994a.

González, H. E., González, S. R. and Brummer, G. A.: Short-term sedimentation pattern of zooplankton, faeces and microplankton at a permanent station in the Bjarna fjorden (Norway) during April-May 1992, *Mar. Ecol. Prog. Ser.*, 105, 31–45, 1994b.

Hamm, C., Reigstad, M., Riser, C. W., Mühlebach, A. and Wassmann, P.: On the trophic fate of *Phaeocystis pouchetii*. VII. Sterols and fatty acids reveal sedimentation of *P. pouchetii*-derived organic matter via krill fecal strings, *Mar Ecol Prog Ser*, 209, 55–69, doi:10.3354/meps209055, 2001.

Head, E. J. H.: Comparison of the chemical composition of particulate material and copepod faecal pellets at stations off the coast of Labrador and in the Gulf of St. Lawrence, *Mar. Biol.*, 112(4), 593–600, doi:10.1007/BF00346177, 1992.

Iversen, M. H. and Poulsen, L.: Coprorhexy, coprophagy, and coprochaly in the copepods *Calanus helgolandicus*, *Pseudocalanus elongatus*, and *Oithona similis*, *Mar. Ecol. Prog. Ser.*, 350(1990), 79–89, doi:10.3354/meps07095, 2007.

Jónasdóttir, S. H., Visser, A. W., Richardson, K. and Heath, M. R.: Seasonal copepod lipid pump promotes carbon sequestration in the deep North Atlantic., *Proc. Natl. Acad. Sci. U. S. A.*, 112(39), 12122–6, doi:10.1073/pnas.1512110112, 2015.

Kobari, T., Steinberg, D. K., Ueda, A., Tsuda, A., Silver, M. W. and Kitamura, M.: Impacts of ontogenetically migrating copepods on downward carbon flux in the western subarctic Pacific Ocean, *Deep Sea Res. Part II Top. Stud. Oceanogr.*, 55(14–15), 1648–1660, doi:10.1016/j.dsr2.2008.04.016, 2008.

Komar, P. D., Morse, A. P., Small, L. F. and Fowler, S. W.: An analysis of sinking rates of natural copepod and euphausiid fecal pellets, *Limnol. Oceanogr.*, 26, 172–180, doi:10.4319/lo.1981.26.1.0172, 1981.

Korb, R. E., Whitehouse, M. J., Atkinson, A. and Thorpe, S.: Magnitude and maintenance of the phytoplankton bloom at South Georgia: a naturally iron-replete environment, *Mar. Ecol. Prog. Ser.*, 368, 75–91, doi:10.3354/meps07525, 2008.

Korb, R. E., Whitehouse, M. J., Ward, P., Gordon, M., Venables, H. J. and Poulton, A. J.: Regional and seasonal differences

in microplankton biomass, productivity, and structure across the Scotia Sea: Implications for the export of biogenic carbon, *Deep Sea Res. Part II Top. Stud. Oceanogr.*, 59–60, 67–77, doi:10.1016/j.dsr2.2011.06.006, 2012.

Kwon, E. Y., Primeau, F. and Sarmiento, J. L.: The impact of remineralization depth on the air–sea carbon balance, *Nat. Geosci.*, 2(9), 630–635, doi:10.1038/ngeo612, 2009.

Laakmann, S., Stumpp, M. and Auel, H.: Vertical distribution and dietary preferences of deep-sea copepods (Euchaetidae and Aetideidae; Calanoida) in the vicinity of the Antarctic Polar Front, *Polar Biol.*, 32(5), 679–689, doi:10.1007/s00300-008-0573-2, 2009.

Lampitt, R. S., Noji, T. and Bodungen, B. Von: What happens to zooplankton faecal pellets? Implications for material flux, *Mar. Biol.*, 104, 15–23, doi:10.1007/BF01313152, 1990.

Manno, C., Stowasser, G., Enderlein, P., Fielding, S. and Tarling, G. A.: The contribution of zooplankton faecal pellets to deep-carbon transport in the Scotia Sea (Southern Ocean), *Biogeosciences*, 12(6), 1955–1965, doi:10.5194/bg-12-1955-2015, 2015.

Martens, P.: Faecal pellets, *Fich. Ident. Zooplankt.*, 162, 1–4, 1978.

Martin, J. H., Knauer, G. A., Karl, D. M. and Broenkow, W. W.: VERTEX: carbon cycling in the northeast Pacific, *Deep Sea Res. Part I Oceanogr. Res. Pap.*, 34(2), 267–285, doi:10.1016/0198-0149(87)90086-0, 1987.

Mauchline, J.: The biology of calanoid copepods, *Adv. Mar. Biol.*, 33, 710, 1998.

Miquel, J.-C., Gasser, B., Martín, J., Marec, C., Babin, M., Fortier, L. and Forest, A.: Downward particle flux and carbon export in the Beaufort Sea, Arctic Ocean; the role of zooplankton, *Biogeosciences*, 12(16), 5103–5117, doi:10.5194/bg-12-5103-2015, 2015.

Murphy, E. J., Watkins, J. L., Trathan, P. N., Reid, K., Meredith, M. P., Thorpe, S. E., Johnston, N. M., Clarke, A., Tarling, G. A., Collins, M. A., Forcada, J., Shreeve, R. S., Atkinson, A., Korb, R., Whitehouse, M. J., Ward, P., Rodhouse, P. G., Enderlein, P., Hirst, A. G., Martin, A. R., Hill, S. L., Staniland, I. J., Pond, D. W., Briggs, D. R., Cunningham, N. J. and Fleming, A. H.: Spatial and temporal operation of the Scotia Sea ecosystem: a review of large-scale links in a krill centred food web, *Philos. Trans. R. Soc. B Biol. Sci.*, 362(1477), 113–148, doi:10.1098/rstb.2006.1957, 2007.

Orsi, H., Whitworth III, T. and Nowlin Jr, W. D.: On the meridional extent and fronts of the Antarctic Circumpolar Current, *Deep Sea Res. Part I Oceanogr. Res. Pap.*, 42(5), 641–673, doi:10.1016/0967-0637(95)00021-W, 1995.

Parekh, P., Dutkiewicz, S., Follows, M. J. and Ito, T.: Atmospheric carbon dioxide in a less dusty world, *Geophys. Res. Lett.*, 33(3), L03610, doi:10.1029/2005GL025098, 2006.

Park, J., Oh, I.-S., Kim, H.-C. and Yoo, S.: Variability of SeaWiFs chlorophyll-a in the southwest Atlantic sector of the Southern Ocean: Strong topographic effects and weak seasonality, *Deep Sea Res. Part I Oceanogr. Res. Pap.*, 57(4), 604–620, doi:10.1016/j.dsr.2010.01.004, 2010.

Ploug, H. and Jorgensen, B. B.: A net-jet flow system for mass transfer and microsensor studies of sinking aggregates, *Mar. Ecol. Prog. Ser.*, 176(1987), 279–290, doi:10.3354/meps176279, 1999.

Poulsen, L. and Iversen, M. H.: Degradation of copepod fecal pellets: key role of protozooplankton, *Mar. Ecol. Prog. Ser.*,

367, 1–13, doi:10.3354/meps07611, 2008.

Poulsen, L. and Kiørboe, T.: Coprophagy and coprorhexy in the copepods *Acartia tonsa* and *Temora longicornis*: clearance rates and feeding behaviour, *Mar. Ecol. Prog. Ser.*, 299, 217–227, doi:10.3354/meps299217, 2005.

Reigstad, M., Riser, C. W. and Svensen, C.: Fate of copepod faecal pellets and the role of *Oithona* spp., *Mar. Ecol. Prog. Ser.*, 304, 265–270, 2005.

Riley, J. S., Sanders, R., Marsay, C., Le Moigne, F., Achterberg, E. P. and Poulton, A. J.: The relative contribution of fast and slow sinking particles to ocean carbon export, *Global Biogeochem. Cycles*, 26, doi:10.1029/2011GB004085, 2012.

Roy, S., Silverberg, N., Romero, N., Deibel, D., Klein, B., Savenkoff, C., V??zina, A., Tremblay, J. ??, Legendre, L. and Rivkin, R. B.: Importance of mesozooplankton feeding for the downward flux of biogenic carbon in the Gulf of St. Lawrence (Canada), *Deep. Res. Part II Top. Stud. Oceanogr.*, 47(3–4), 519–544, doi:10.1016/S0967-0645(99)00117-4, 2000.

Sarmiento, J. L. and Gruber, N.: *Ocean Biogeochemical Dynamics*, Princeton University Press, Princeton., 2006.

Small, L. F., Fowler, S. W. and Ünlü, M. Y.: Sinking rates of natural copepod fecal pellets, *Mar. Biol.*, 51(3), 233–241, doi:10.1007/BF00386803, 1979.

Smetacek, V., Assmy, P. and Henjes, J.: The role of grazing in structuring Southern Ocean pelagic ecosystems and biogeochemical cycles, *Antarct. Sci.*, 16(4), 541–558, doi:10.1017/S0954102004002317, 2004.

Smith, Jr., K. L., Sherman, A. D., Huffard, C. L., McGill, P. R., Henthorn, R., Von Thun, S., Ruhl, H. A., Kahru, M. and Ohman, M. D.: Large salp bloom export from the upper ocean and benthic community response in the abyssal northeast Pacific: Day to week resolution, *Limnol. Oceanogr.*, 59(3), 745–757, doi:10.4319/lo.2014.59.3.0745, 2014.

Stamieszkin, K., Pershing, A. J., Record, N. R., Pilskaln, C. H., Dam, H. G. and Feinberg, L. R.: Size as the master trait in modeled copepod fecal pellet carbon flux, *Limnol. Oceanogr.*, 60, 2090–2107, doi:10.1002/lno.10156, 2015.

Steinberg, D. K., Carlson, C. A., Bates, N. R., Goldthwait, S. A., Madin, L. P. and Michaels, A. F.: Zooplankton vertical migration and the active transport of dissolved organic and inorganic carbon in the Sargasso Sea, *Deep Sea Res. Part I Oceanogr. Res. Pap.*, 47, 137–158, doi:10.1016/S0967-0637(99)00052-7, 2000.

Suzuki, H., Sasaki, H. and Fukuchi, M.: Short-term variability in the flux of rapidly sinking particles in the Antarctic marginal ice zone, *Polar Biol.*, 24(9), 697–705, doi:10.1007/s003000100271, 2001.

Suzuki, H., Sasaki, H. and Fukuchi, M.: Loss processes of sinking fecal pellets of zooplankton in the mesopelagic layers of the Antarctic marginal ice zone, *J. Oceanogr.*, 59(6), 809–818, doi:10.1023/B:JOCE.0000009572.08048.0d, 2003.

Svensen, C. and Nejstgaard, J. C.: Is sedimentation of copepod faecal pellets determined by cyclopoids? Evidence from enclosed ecosystems, *J. Plankton Res.*, 25(8), 917–926, doi:10.1093/plankt/25.8.917, 2003.

Thibault, D., Roy, S., Wong, C. S. and Bishop, J. K.: The downward flux of biogenic material in the NE subarctic Pacific: Importance of algal sinking and mesozooplankton herbivory, *Deep. Res. Part II Top. Stud. Oceanogr.*, 46(11–12), 2669–2697, doi:10.1016/S0967-0645(99)00080-6, 1999.

Thorpe, S. E., Heywood, K. J., Brandon, M. A. and Stevens, D. P.: Variability of the southern Antarctic Circumpolar Current

front north of South Georgia, *J. Mar. Syst.*, 37(1–3), 87–105, doi:10.1016/S0924-7963(02)00197-5, 2002.

Thorpe, S. E., Murphy, E. J. and Watkins, J. L.: Circumpolar connections between Antarctic krill (*Euphausia superba* Dana) populations: investigating the roles of ocean and sea ice transport, *Deep Sea Res. Part A. Oceanogr. Res. Pap.*, 54, 794–810, doi:10.1016/j.dsr.2007.01.008, 2007.

Turner, J. T.: Zooplankton fecal pellets, marine snow and sinking phytoplankton blooms, *Aquat. Microb. Ecol.*, 27, 57–102, doi:10.3354/ame027057, 2002.

Turner, J. T.: Zooplankton fecal pellets, marine snow, phytodetritus and the ocean's biological pump, *Prog. Oceanogr.*, 130, 205–248, doi:10.1016/j.pocean.2014.08.005, 2015.

Urban-Rich, J., Nordby, E. and Andreassen, I.: Contribution by mesozooplankton fecal pellets to the carbon flux on Nordvestkbanken, north Norwegian shelf in 1994, *Sarsia*, 84(March), 253–264, doi:10.1080/00364827.1999.10420430, 1999.

Urrere, M. A. and Knauer, G. A.: Zooplankton fecal pellet fluxes and vertical transport of particulate organic material in the pelagic environment, *J. Plankton Res.*, 3(3), 369–387, doi:10.1093/plankt/3.3.369, 1981.

Viitasalo, M., Rosenberg, M., Heiskanen, A.-S. and Koski, M.: Sedimentation of copepod fecal material in the coastal northern Baltic Sea: Where did all the pellets go?, *Limnol. Ocean.*, 44(6), 1388–1399, doi:10.4319/lo.1999.44.6.1388, 1999.

Vinogradov, M. E.: Feeding of the deep-sea zooplankton, *Rapp P- V Cons. Int. Explor. Mer*, 153, 114–120, 1962.

Volk, T. and Hoffert, M. I.: Ocean Carbon Pumps: Analysis of relative strengths and efficiencies in ocean driven atmospheric CO<sub>2</sub> changes, in *The carbon cycle and atmospheric CO<sub>2</sub>: Natural variations Archean to Present*, edited by E. T. Sundquist and W. S. Broecker, pp. 99–110, American Geophysical Union, Washington, DC., 1985.

Wallace, M. I., Cottier, F. R., Brierley, A. S. and Tarling, G. A.: Modelling the influence of copepod behaviour on faecal pellet export at high latitudes, *Polar Biol.*, 36(4), 579–592, doi:10.1007/s00300-013-1287-7, 2013.

Ward, P. and Shreeve, R.: The spring mesozooplankton community at South Georgia: a comparison of shelf and oceanic sites, *Polar Biol.*, 22, 289–301, doi:10.1007/s003000050422, 1999.

Ward, P., Atkinson, A., Murray, A. W. A., Wood, A. G., Williams, R. and Poulet, S. A.: The summer zooplankton community at South Georgia: biomass, vertical migration and grazing, *Polar Biol.*, 195–208, doi:10.1007/BF00239059, 1995.

Ward, P., Shreeve, R., Atkinson, A., Korb, B., Whitehouse, M., Thorpe, S., Pond, D. and Cunningham, N.: Plankton community structure and variability in the Scotia Sea: austral summer 2003, *Mar. Ecol. Prog. Ser.*, 309, 75–91, doi:10.3354/meps309075, 2006a.

Ward, P., Shreeve, R. and Tarling, G. A.: The autumn mesozooplankton community at South Georgia: Biomass, population structure and vertical distribution, *Polar Biol.*, 29(11), 950–962, doi:10.1007/s00300-006-0136-3, 2006b.

Ward, P., Atkinson, A. and Tarling, G.: Mesozooplankton community structure and variability in the Scotia Sea: A seasonal comparison, *Deep Sea Res. Part II Top. Stud. Oceanogr.*, 59–60, 78–92, doi:10.1016/j.dsr2.2011.07.004, 2012.

Ward, P., Tarling, G. A. and Thorpe, S. E.: Mesozooplankton in the Southern Ocean: Spatial and temporal patterns from



673 Discovery Investigations, *Prog. Oceanogr.*, 120, 305–319, doi:10.1016/j.pocean.2013.10.011, 2014.

674 Wassmann, P., Erik, J. and Tselepides, A.: Vertical flux of faecal pellets and microplankton on the shelf of the oligotrophic  
675 Cretan Sea ( NE Mediterranean Sea ), *Prog. Oceanogr.*, 46, 241–258, doi:10.1016/S0079-6611(00)00021-5, 2000.

676 Wexels-Riser, C., Wassmann, P., Olli, K. and Arashkevich, E.: Production, retention and export of zooplankton faecal  
677 pellets on and off the Iberian shelf, north-west Spain, *Prog. Oceanogr.*, 51(2–4), 423–441, doi:10.1016/S0079-  
678 6611(01)00078-7, 2001.

679 Wexels Riser, C., Reigstad, M., Wassmann, P., Arashkevich, E. and Falk-Petersen, S.: Export or retention? Copepod  
680 abundance, faecal pellet production and vertical flux in the marginal ice zone through snap shots from the northern Barents  
681 Sea, *Polar Biol.*, 30, 719–730, doi:10.1007/s00300-006-0229-z, 2007.

682 Wexels Riser, C., Reigstad, M. and Wassmann, P.: Zooplankton-mediated carbon export : A seasonal study in a northern  
683 Norwegian fjord Norwegian fjord, *Mar. Biol. Res.*, 6(5), 461–471, doi:10.1080/17451000903437067, 2010.

684 Whitehouse, M. J., Korb, R. E., Atkinson, A., Thorpe, S. E. and Gordon, M.: Formation, transport and decay of an intense  
685 phytoplankton bloom within the High-Nutrient Low-Chlorophyll belt of the Southern Ocean, *J. Mar. Syst.*, 70(1–2), 150–  
686 167, doi:10.1016/j.jmarsys.2007.05.003, 2008.

687 Whitehouse, M. J., Atkinson, A., Korb, R. E., Venables, H. J., Pond, D. W. and Gordon, M.: Substantial primary production  
688 in the land-remote region of the central and northern Scotia Sea, *Deep Sea Res. Part II Top. Stud. Oceanogr.*, 59–60, 47–56,  
689 doi:10.1016/j.dsr2.2011.05.010, 2012.

690 Wilson, S. E., Steinberg, D. K. and Buesseler, K. O.: Changes in fecal pellet characteristics with depth as indicators of  
691 zooplankton repackaging of particles in the mesopelagic zone of the subtropical and subarctic North Pacific Ocean, *Deep  
692 Sea Res. Part II Top. Stud. Oceanogr.*, 55(14–15), 1636–1647, doi:10.1016/j.dsr2.2008.04.019, 2008.

693 Wilson, S. E., Ruhl, H. A. and Smith, K. L.: Zooplankton fecal pellet flux in the abyssal northeast Pacific : A 15 year time-  
694 series study, *Limnol. Oceanogr.*, 58(3), 881–892, doi:10.4319/lo.2013.58.3.0881, 2013.

695 Yoon, W. D., Kim, S. K. and Han, K. N.: Morphology and sinking velocities of fecal pellets of copepod, molluscan,  
696 euphausiid, and salp taxa in the northeastern tropical Atlantic, *Mar. Biol.*, 139(5), 923–928, doi:10.1007/s002270100630,  
697 2001.

698

699

700     **Tables**

701     **Table 1: Details of marine snow catcher (MSC) deployments during cruises JR291 and JR304 to the Scotia Sea**

| Cruise | Site | Latitude | Longitude | Date       | Time (GMT) | Depth of MSC (m) |
|--------|------|----------|-----------|------------|------------|------------------|
| JR291  | P2   | -55.192  | -41.342   | 02/12/2013 | 23:45      | 176              |
|        | P2   | -55.196  | -41.332   | 03/12/2013 | 15:54      | 204              |
|        | P2   | -55.259  | -41.295   | 07/12/2013 | 15:07      | 203              |
|        | P3   | -52.769  | -40.155   | 13/12/2013 | 13:49      | 205              |
|        | P3   | -52.769  | -40.154   | 14/12/2013 | 06:33      | 180              |
| JR304  | P3   | -52.8116 | -39.9727  | 12/12/2014 | 22:40      | 176              |
|        | P3   | -52.8118 | -39.9726  | 13/12/2014 | 22:47      | 183              |

702  
703  
704     **Table 2: FP fluxes ( $\pm$ SE, nFP m<sup>-2</sup> d<sup>-1</sup>) of ovoid, cylindrical and elliptical (Cyl+Ell), and round FP at P2 and P3 as measured in**  
705     **Marine Snow Catchers (MSC) and sediment traps (ST) in the Scotia Sea in spring.**

|        | <u>P2</u>                      |                                |                                |                                 | <u>P3</u>                      |                                 |                                 |                                 |
|--------|--------------------------------|--------------------------------|--------------------------------|---------------------------------|--------------------------------|---------------------------------|---------------------------------|---------------------------------|
|        | Ovoid                          | Cyl + Ell                      | Round                          | Total                           | Ovoid                          | Cyl + Ell                       | Round                           | Total                           |
| MSC    | <u>6,309</u>                   | <u>21,128</u>                  | <u>14,596</u>                  | <u>89,850</u>                   | <u>13,416</u>                  | <u>190,716</u>                  | <u>32,172</u>                   | <u>236,304</u>                  |
|        | <u>(<math>\pm</math>2,698)</u> | <u>(<math>\pm</math>1,328)</u> | <u>(<math>\pm</math>1,124)</u> | <u>(<math>\pm</math>11,922)</u> | <u>(<math>\pm</math>8,207)</u> | <u>(<math>\pm</math>51,623)</u> | <u>(<math>\pm</math>15,239)</u> | <u>(<math>\pm</math>63,079)</u> |
| ST     | <u>640</u>                     | <u>238</u>                     | <u>175</u>                     | <u>1,052</u>                    | <u>11,226</u>                  | <u>7,406</u>                    | <u>4,668</u>                    | <u>23,300</u>                   |
|        | <u>(<math>\pm</math>33)</u>    | <u>(<math>\pm</math>82)</u>    | <u>(<math>\pm</math>37)</u>    | <u>(<math>\pm</math>152)</u>    | <u>(<math>\pm</math>706)</u>   | <u>(<math>\pm</math>1,274)</u>  | <u>(<math>\pm</math>14)</u>     | <u>(<math>\pm</math>1,994)</u>  |
| MSC/ST | <u>9.9</u>                     | <u>88.9</u>                    | <u>83.5</u>                    | <u>39.9</u>                     | <u>1.2</u>                     | <u>25.8</u>                     | <u>6.9</u>                      | <u>10.1</u>                     |

707

708 **Figures and Figure Legends**

709

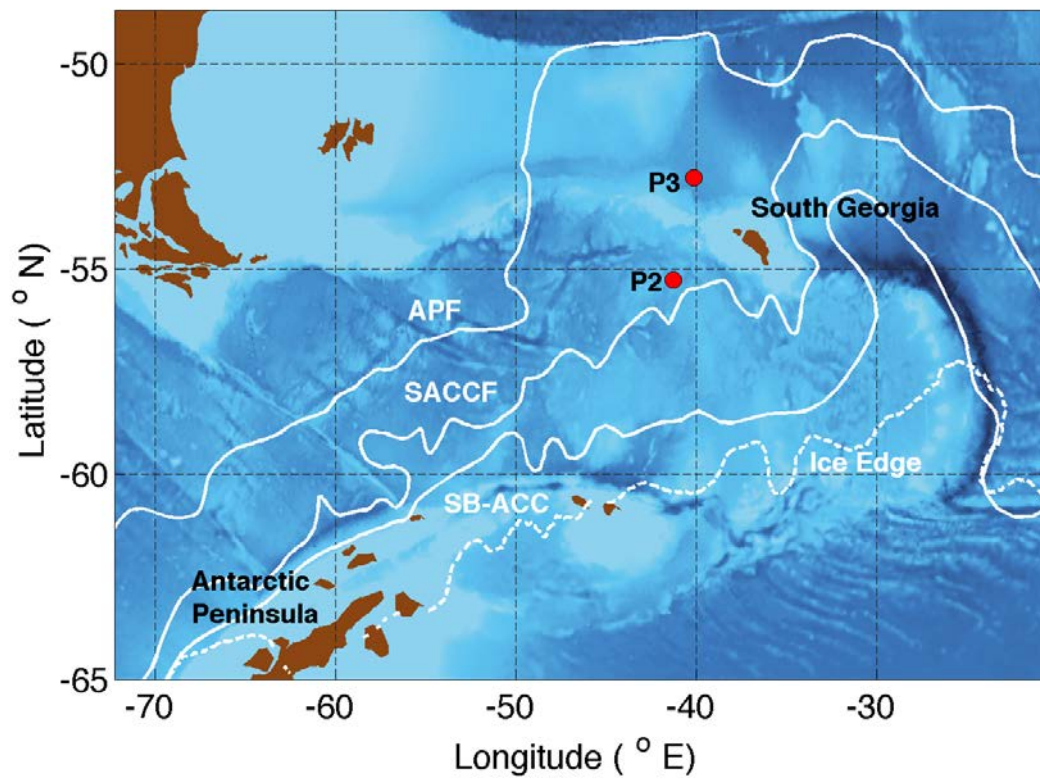

710

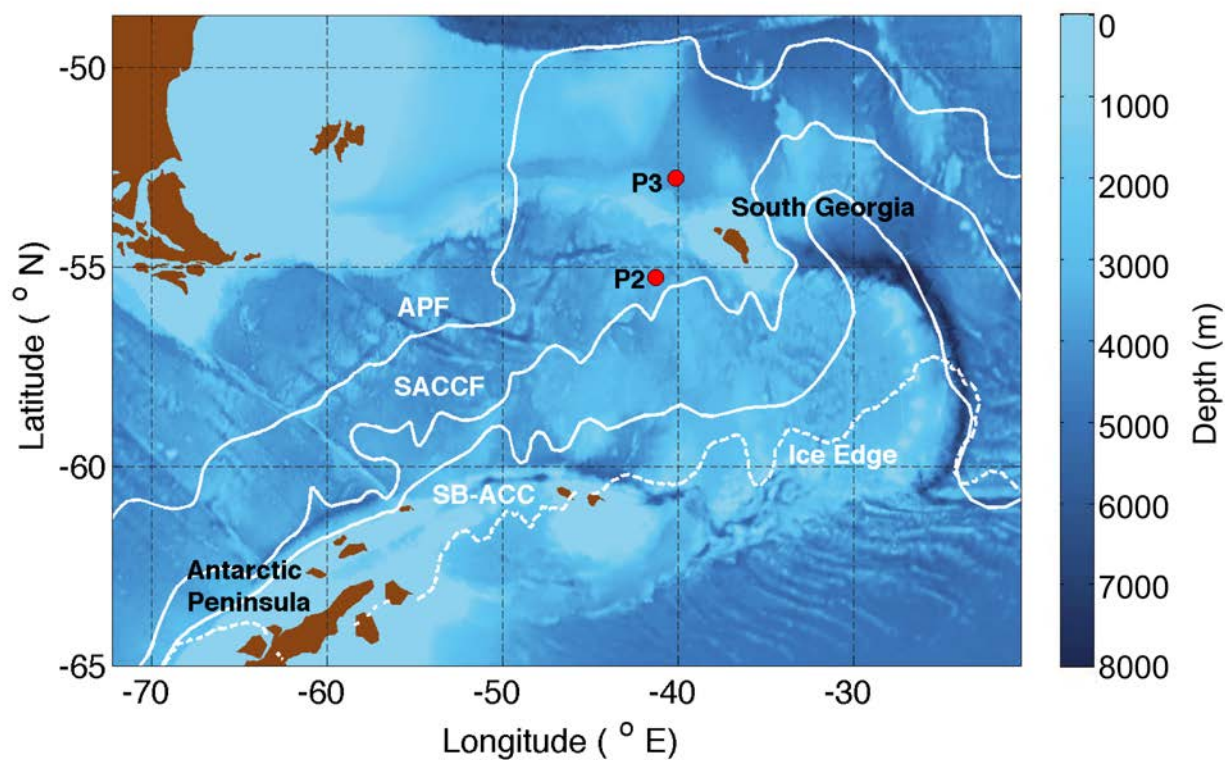

Figure 1: Stations sampled in the Scotia Sea. White lines indicate average frontal positions. APF=Antarctic Polar Front (Orsi et al., 1995), SACCF = Southern Antarctic Circumpolar Current Front (Thorpe et al., 2002), SB-ACC=Southern Boundary - Antarctic Circumpolar Current (Orsi et al., 1995). White dotted lines indicates the position of the ice edge on 3<sup>rd</sup> Dec 2013 (OSTIA Sea Ice satellite data).

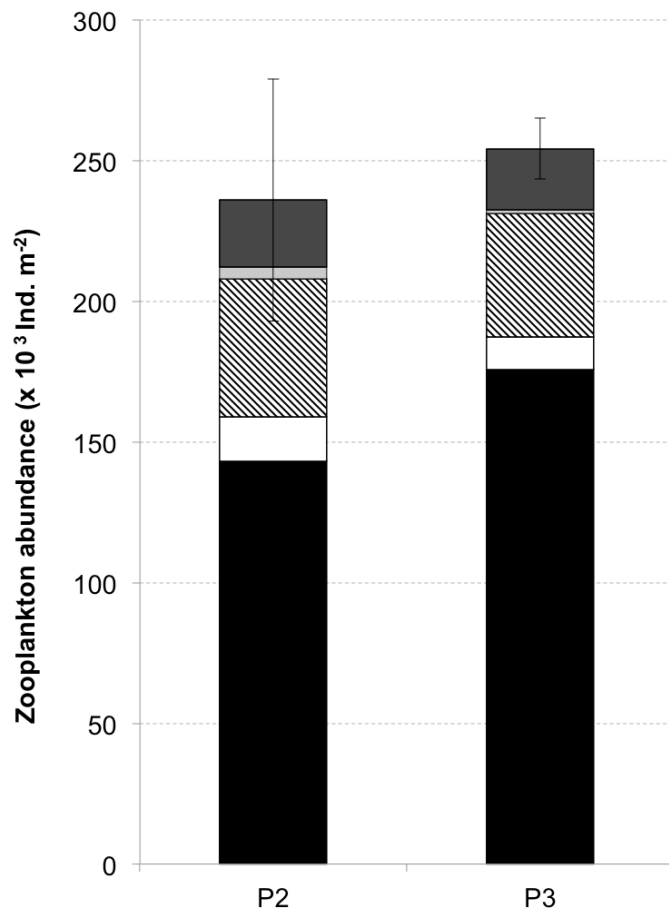

**Figure 2: Average zooplankton abundances ( $\times 10^3$  Ind.  $\text{m}^{-2}$  (0-200m)) measured in the Scotia Sea in December 2013 and 2014 using a 200  $\mu\text{m}$  mesh. Small microcopepods (black), large calanoids (white), other copepods (striped), small euphausiids (light grey), other zooplankton (dark grey) (see text for full details on groups). Error bars show  $\pm\text{SE}$  of total zooplankton abundance based on multiple Bongo net tows at each site.**

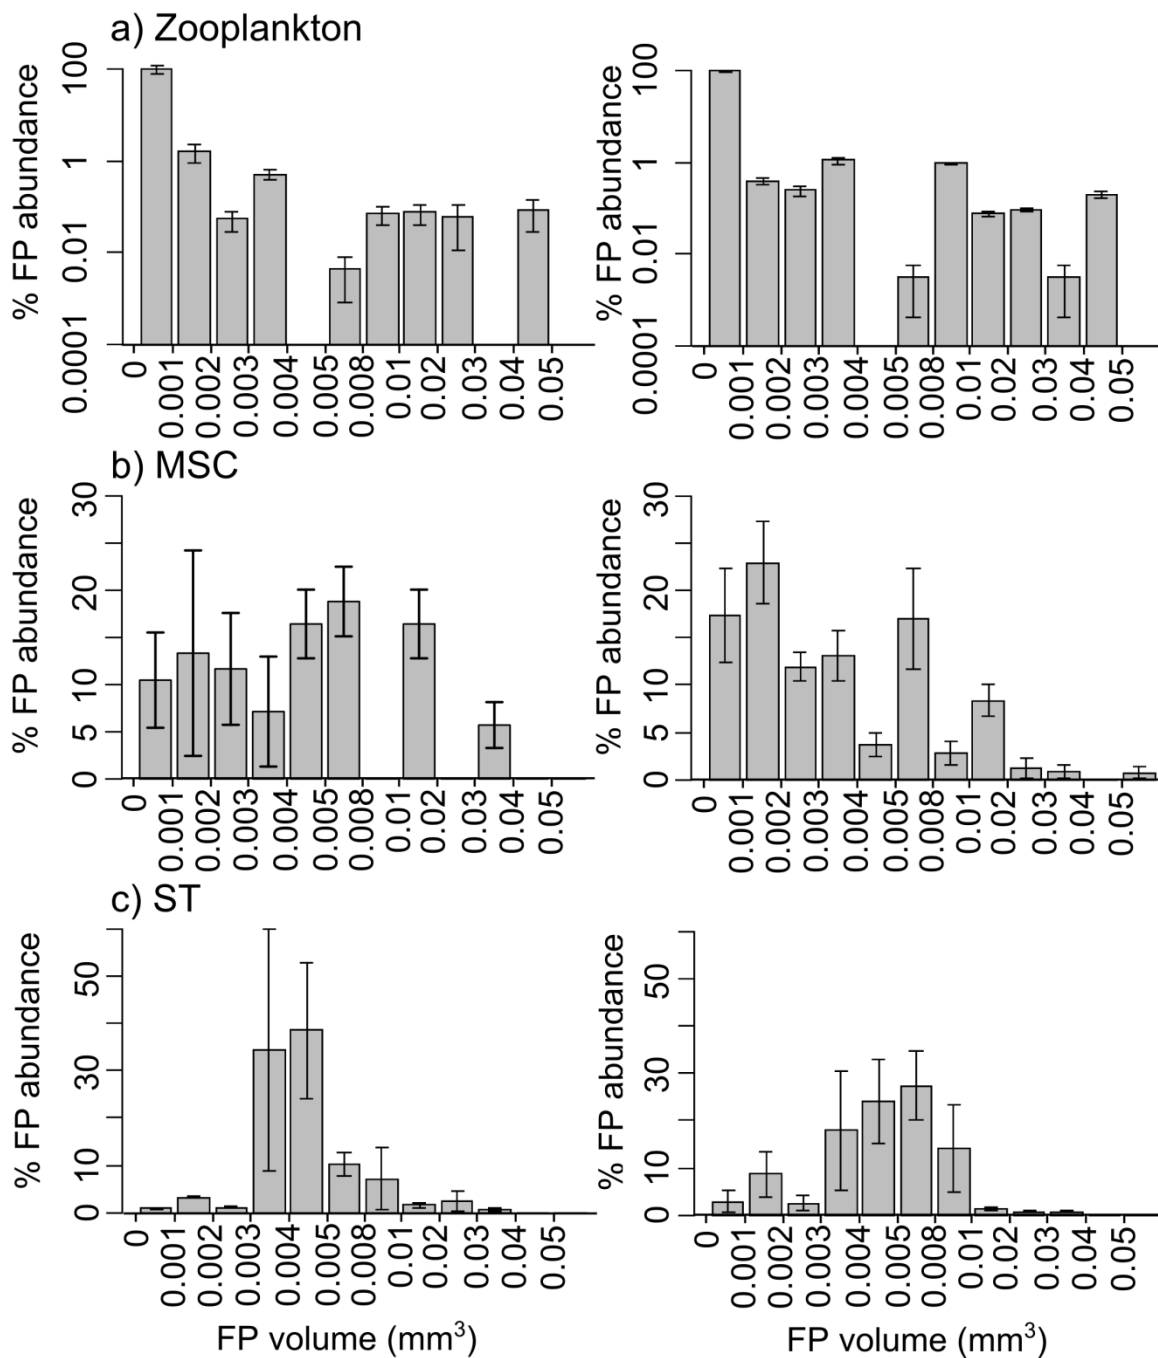

**Figure 3: Faecal pellet size distributions for P2 (left) and P3 (right) in the Scotia Sea. The percent (%) abundance of faecal pellets in each size class (volume,  $\text{mm}^3$ ) is presented for; a) estimated egested faecal pellet size distributions based on mesozooplankton abundances (200  $\mu\text{m}$  mesh), b) faecal pellets measured in marine snow catchers (MSC) at MLD+110 m averages ( $\pm\text{SE}$ ), and c) faecal pellets in sediment traps (ST). Krill faecal pellets have been removed. Note the uneven faecal pellet volume size classes, and log scale on the Y axis for a.**

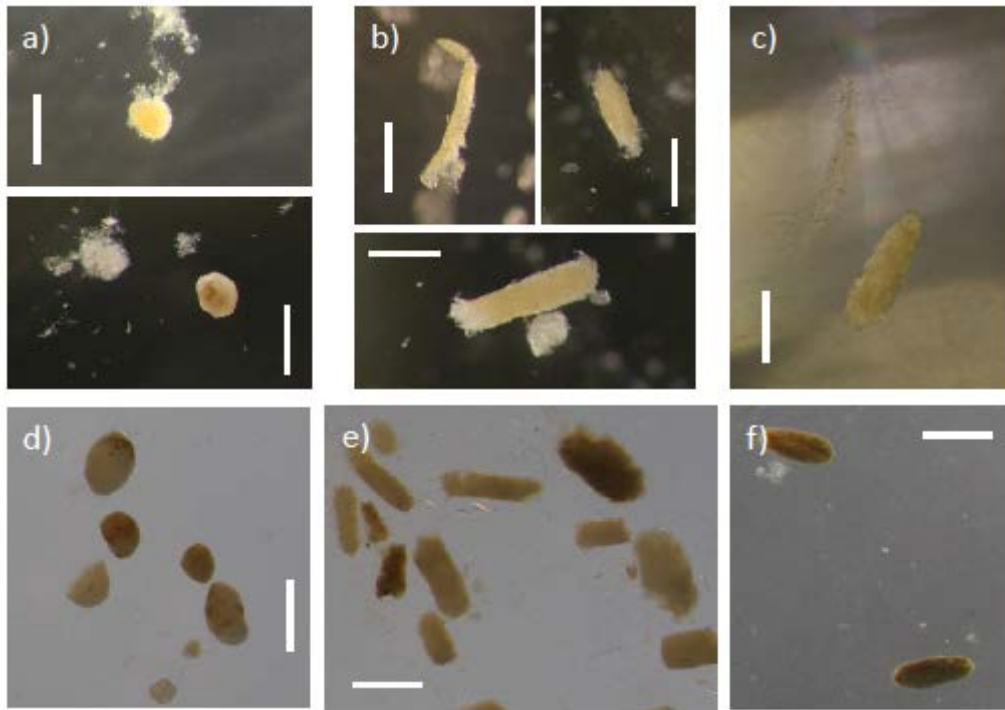

**Figure 4: Light microscopy photographs of faecal pellets collected from Marine Snow Catchers (A-C) and sediment traps (D-F). The different morphological classes are illustrated; a)+d)) round, b)+e) cylindrical, c)+f) ovoid. Scale bar = 0.5 mm.**



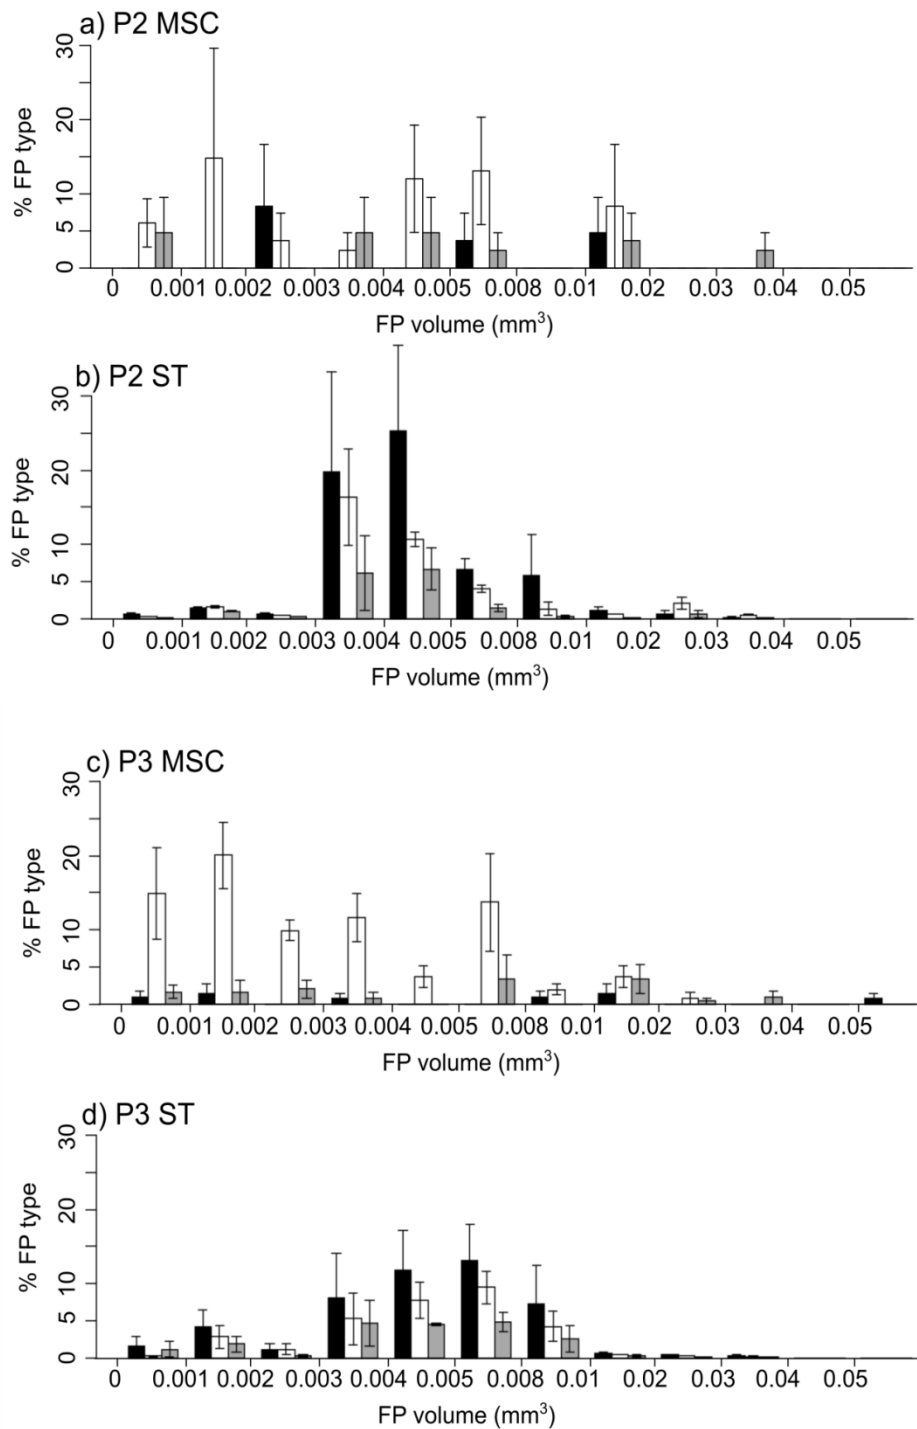

**Figure 5:** Percent (%) contribution of each pellet type to total faecal pellet abundance, ovoid (black), cylindrical and elliptical (white) and round (grey). FP from a) P2 Marine Snow Catcher, b) P2 sediment trap, c) P3 Marine Snow Catcher, d) P3 sediment trap. Krill faecal pellets have been removed. Note the uneven faecal pellet volume size classes.

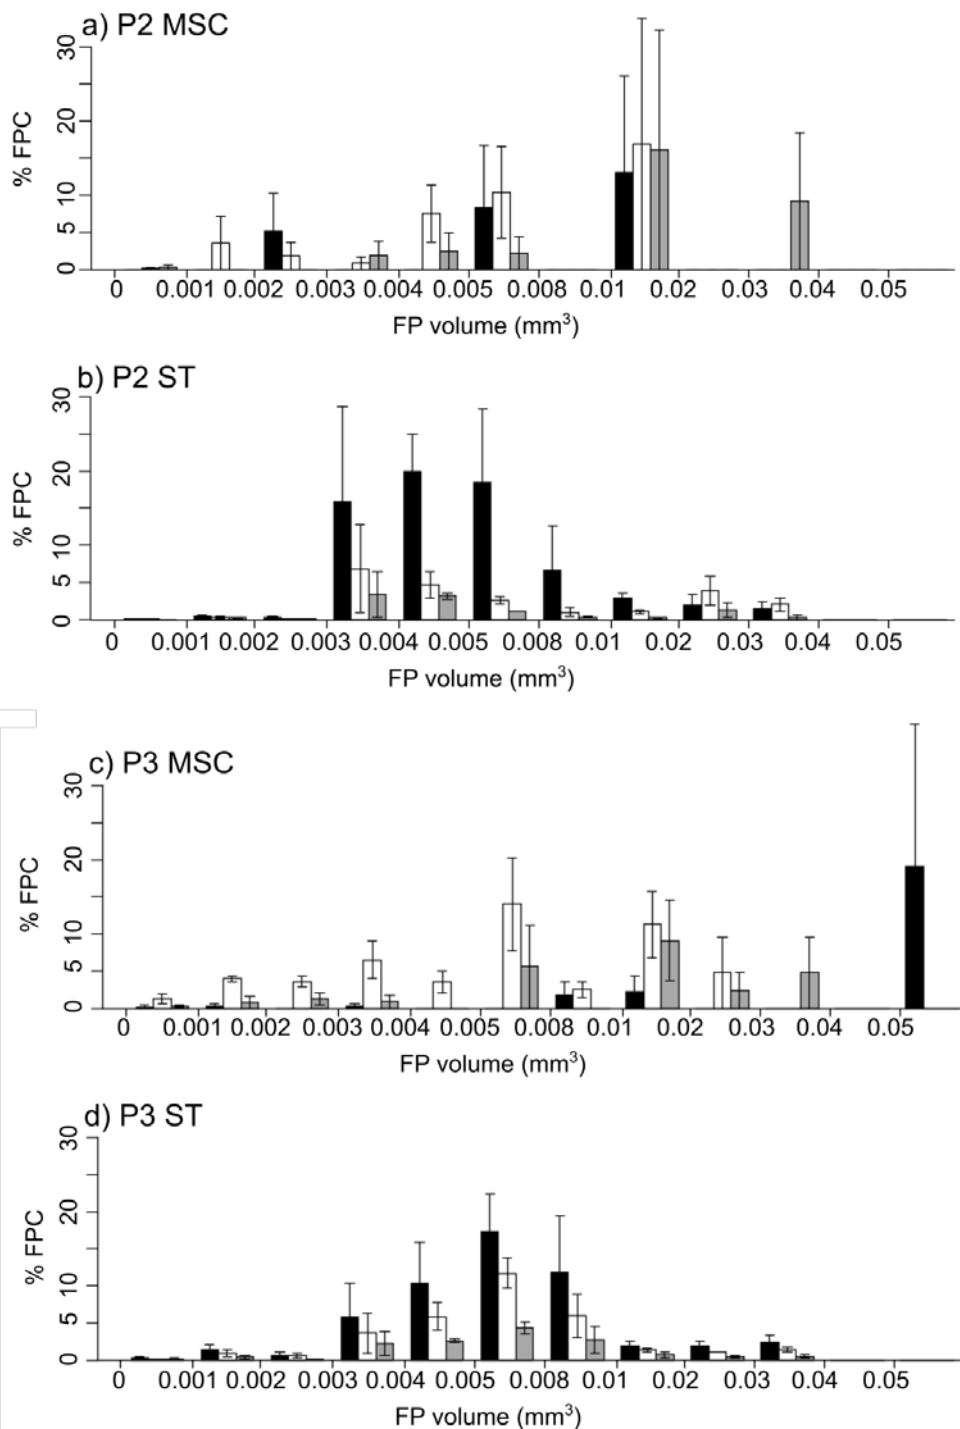

**Figure 6: Percent (%) contribution of each pellet type to total faecal pellet carbon, ovoid (black), cylindrical and elliptical (white) and round (grey). FP from a) P2 Marine Snow Catcher, b) P2 sediment trap, c) P3 Marine Snow Catcher, d) P3 sediment trap. Krill faecal pellets have been removed. Note the uneven faecal pellet volume size classes.**

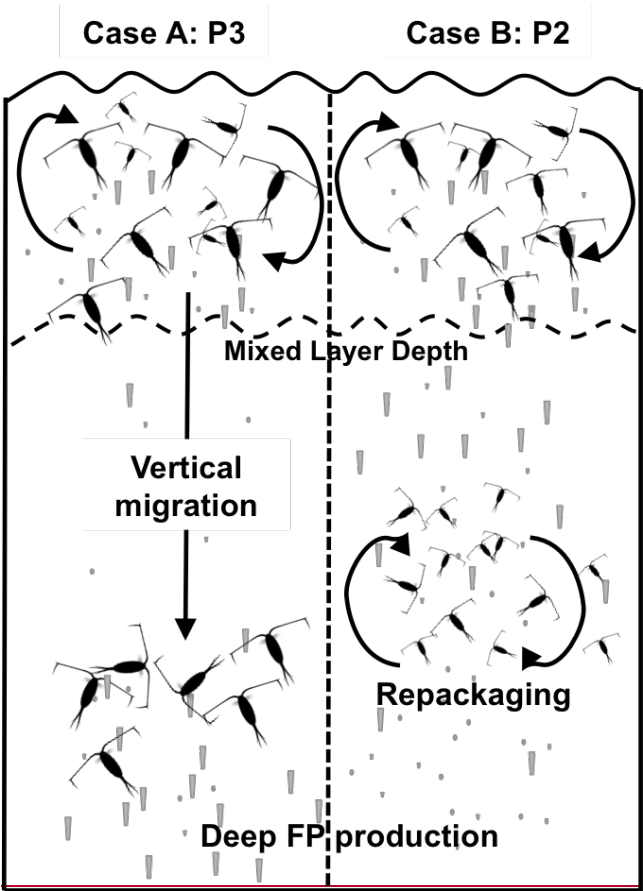

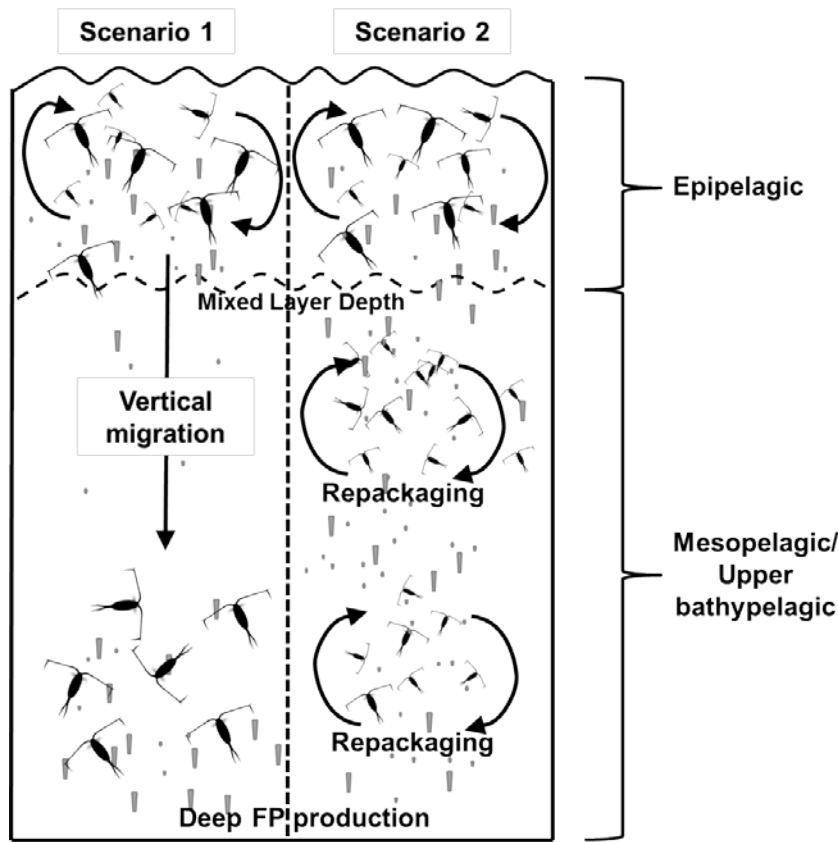

Figure 7: Schematic to illustrate the **dominant-possible** mechanisms of deep FP production that are suggested to be occurring at our study sites **in the Scotia Sea P2 (right) and P3 (left)**. In **Case A Scenario 1**, intact FP reach the deep ocean via vertical migration of zooplankton, whereas, in **Case Scenario 2B**, FP at depth **are due to result from** in situ repackaging of sinking detritus by deep dwelling zooplankton. **The actual mechanisms occurring in the mesopelagic are likely to be a complex combination of both scenarios.**

## Supplementary Table

**Table S1: Absolute number of FP counted in sediment trap (ST) sample split and Marine Snow Catcher (MSC) samples. Three replicates were counted for ST samples and are presented as mean (standard deviation), where as all FP collected in the MSC samples were counted. Krill FP are not included.**

| <u>Cruise</u>   | <u>Site</u> | <u>Sampling Method</u> | <u># FP</u>       |
|-----------------|-------------|------------------------|-------------------|
| <u>JR291</u>    | <u>P2</u>   | <u>MSC</u>             | <u>4</u>          |
|                 | <u>P2</u>   | <u>MSC</u>             | <u>9</u>          |
|                 | <u>P2</u>   | <u>MSC</u>             | <u>28</u>         |
|                 | <u>P3</u>   | <u>MSC</u>             | <u>15</u>         |
|                 | <u>P3</u>   | <u>MSC</u>             | <u>74</u>         |
|                 | <u>P3</u>   | <u>MSC</u>             | <u>120</u>        |
| <u>JR304</u>    | <u>P3</u>   | <u>MSC</u>             | <u>252</u>        |
|                 | <u>P3</u>   | <u>MSC</u>             | <u>252</u>        |
| <u>Dec 2009</u> | <u>P2</u>   | <u>ST</u>              | <u>422 (98)</u>   |
|                 | <u>P3</u>   | <u>ST</u>              | <u>1156 (195)</u> |
| <u>Dec 2010</u> | <u>P2</u>   | <u>ST</u>              | <u>564 (134)</u>  |
|                 | <u>P3</u>   | <u>ST</u>              | <u>974 (238)</u>  |

**Table S2: Sinking velocities and volumes of FP (excluding krill FP) collected in Marine Snow Catchers at P2 and P3 during research cruises JR291 and JR304.**

| <u>Site</u> | <u>FP volume (mm<sup>3</sup>)</u> | <u>FP sinking velocity (m d<sup>-1</sup>)</u> | <u>Site</u> | <u>FP volume (mm<sup>3</sup>)</u> | <u>FP sinking velocity (m d<sup>-1</sup>)</u> |
|-------------|-----------------------------------|-----------------------------------------------|-------------|-----------------------------------|-----------------------------------------------|
| <u>P2</u>   | <u>0.040</u>                      | <u>144</u>                                    | <u>P3</u>   | <u>0.010</u>                      | <u>75</u>                                     |
| <u>P2</u>   | <u>0.031</u>                      | <u>270</u>                                    | <u>P3</u>   | <u>0.027</u>                      | <u>57</u>                                     |
| <u>P2</u>   | <u>0.008</u>                      | <u>52</u>                                     | <u>P3</u>   | <u>0.002</u>                      | <u>48</u>                                     |
| <u>P2</u>   | <u>0.040</u>                      | <u>144</u>                                    | <u>P3</u>   | <u>0.026</u>                      | <u>87</u>                                     |
| <u>P2</u>   | <u>0.031</u>                      | <u>135</u>                                    | <u>P3</u>   | <u>0.002</u>                      | <u>51</u>                                     |
| <u>P2</u>   | <u>0.057</u>                      | <u>134</u>                                    | <u>P3</u>   | <u>0.005</u>                      | <u>68</u>                                     |
| <u>P2</u>   | <u>0.019</u>                      | <u>342</u>                                    | <u>P3</u>   | <u>0.014</u>                      | <u>49</u>                                     |
| <u>P2</u>   | <u>0.011</u>                      | <u>382</u>                                    | <u>P3</u>   | <u>0.028</u>                      | <u>92</u>                                     |
| <u>P2</u>   | <u>0.072</u>                      | <u>247</u>                                    | <u>P3</u>   | <u>0.023</u>                      | <u>106</u>                                    |
| <u>P2</u>   | <u>0.044</u>                      | <u>101</u>                                    | <u>P3</u>   | <u>0.009</u>                      | <u>24</u>                                     |
| <u>P2</u>   | <u>0.007</u>                      | <u>193</u>                                    | <u>P3</u>   | <u>0.091</u>                      | <u>92</u>                                     |
| <u>P2</u>   | <u>0.017</u>                      | <u>116</u>                                    | <u>P3</u>   | <u>0.066</u>                      | <u>140</u>                                    |
| <u>P2</u>   | <u>0.035</u>                      | <u>207</u>                                    | <u>P3</u>   | <u>0.012</u>                      | <u>57</u>                                     |
| <u>P2</u>   | <u>0.002</u>                      | <u>246</u>                                    | <u>P3</u>   | <u>0.006</u>                      | <u>65</u>                                     |
| <u>P2</u>   | <u>0.016</u>                      | <u>61</u>                                     | <u>P3</u>   | <u>0.010</u>                      | <u>62</u>                                     |
| <u>P2</u>   | <u>0.001</u>                      | <u>120</u>                                    | <u>P3</u>   | <u>0.006</u>                      | <u>64</u>                                     |

|           |              |           |           |              |            |
|-----------|--------------|-----------|-----------|--------------|------------|
| <u>P2</u> | <u>0.003</u> | <u>98</u> | <u>P3</u> | <u>0.002</u> | <u>47</u>  |
|           |              |           | <u>P3</u> | <u>0.037</u> | <u>36</u>  |
|           |              |           | <u>P3</u> | <u>0.031</u> | <u>53</u>  |
|           |              |           | <u>P3</u> | <u>0.014</u> | <u>122</u> |
|           |              |           | <u>P3</u> | <u>0.021</u> | <u>36</u>  |
|           |              |           | <u>P3</u> | <u>0.077</u> | <u>100</u> |
|           |              |           | <u>P3</u> | <u>0.018</u> | <u>62</u>  |
|           |              |           | <u>P3</u> | <u>0.026</u> | <u>64</u>  |
|           |              |           | <u>P3</u> | <u>0.013</u> | <u>79</u>  |
|           |              |           | <u>P3</u> | <u>0.083</u> | <u>227</u> |
|           |              |           | <u>P3</u> | <u>0.286</u> | <u>203</u> |
|           |              |           | <u>P3</u> | <u>0.165</u> | <u>189</u> |
|           |              |           | <u>P3</u> | <u>0.007</u> | <u>100</u> |
|           |              |           | <u>P3</u> | <u>0.006</u> | <u>74</u>  |
|           |              |           | <u>P3</u> | <u>0.005</u> | <u>13</u>  |
|           |              |           | <u>P3</u> | <u>0.115</u> | <u>106</u> |
|           |              |           | <u>P3</u> | <u>0.021</u> | <u>60</u>  |
|           |              |           | <u>P3</u> | <u>0.005</u> | <u>68</u>  |
|           |              |           | <u>P3</u> | <u>0.018</u> | <u>79</u>  |
|           |              |           | <u>P3</u> | <u>0.006</u> | <u>49</u>  |
|           |              |           | <u>P3</u> | <u>0.009</u> | <u>64</u>  |
|           |              |           | <u>P3</u> | <u>0.003</u> | <u>155</u> |
|           |              |           | <u>P3</u> | <u>0.005</u> | <u>222</u> |
|           |              |           | <u>P3</u> | <u>0.256</u> | <u>144</u> |
|           |              |           | <u>P3</u> | <u>0.002</u> | <u>82</u>  |
|           |              |           | <u>P3</u> | <u>0.006</u> | <u>133</u> |
